# Supplementary material
Source: PubMed Central journal article supplement (PMC9950066)

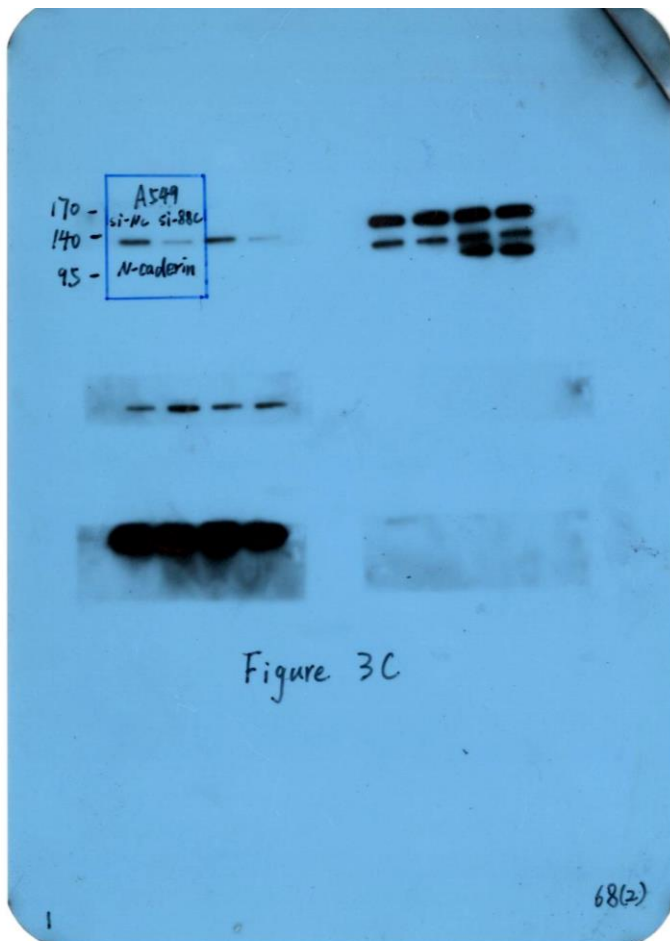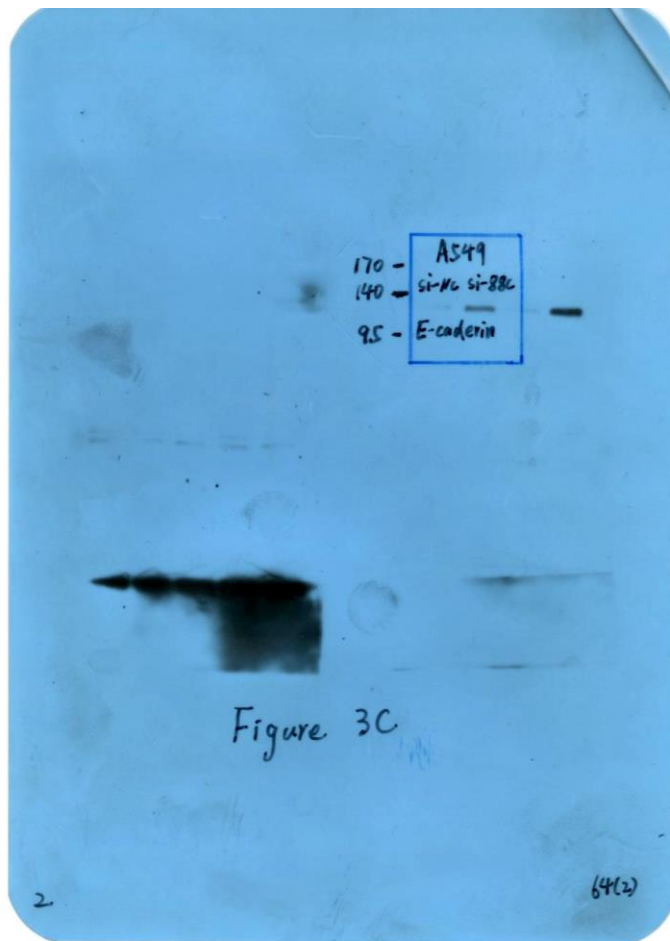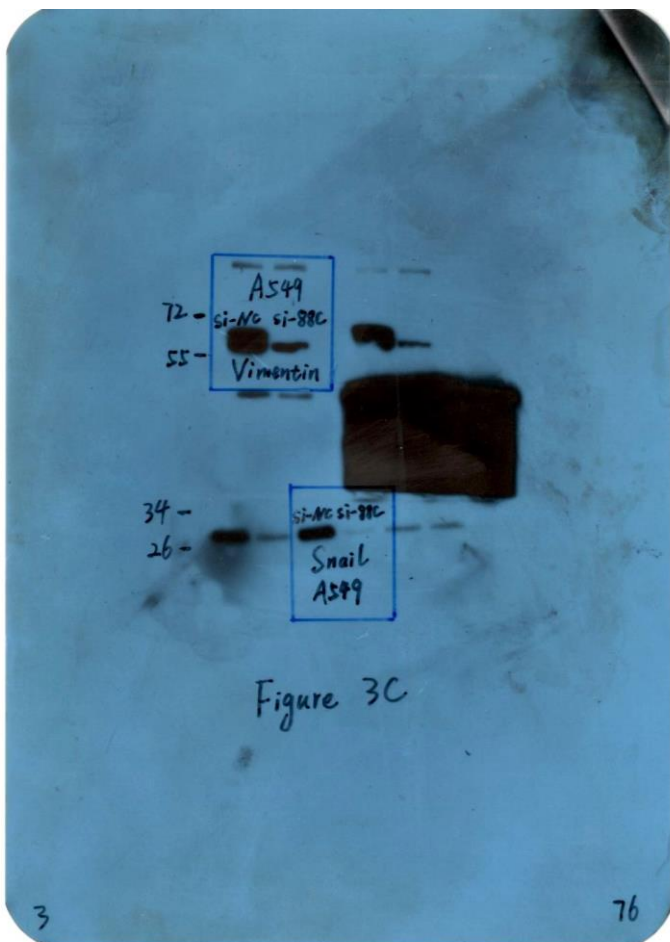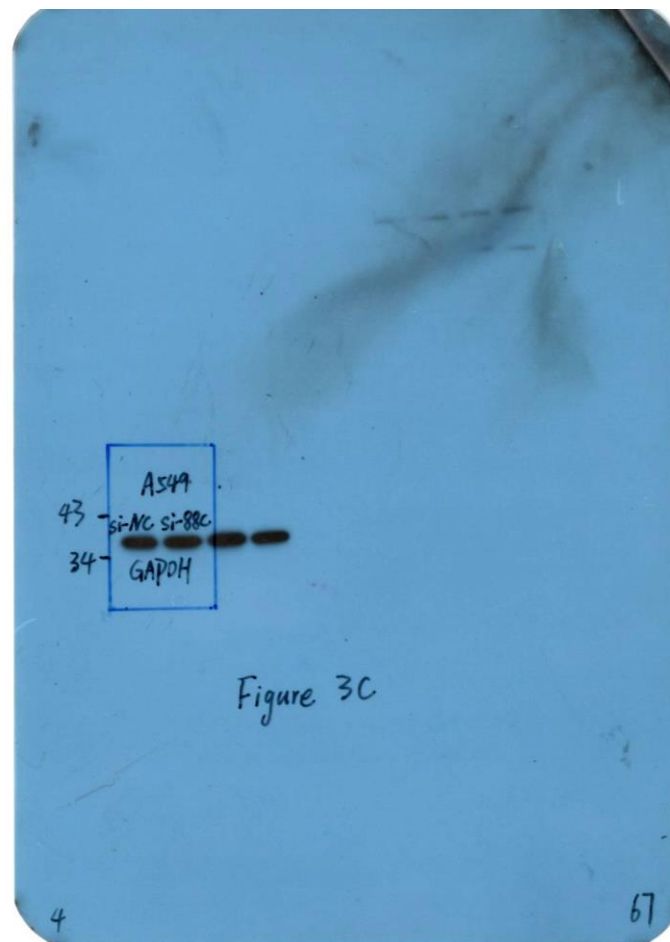

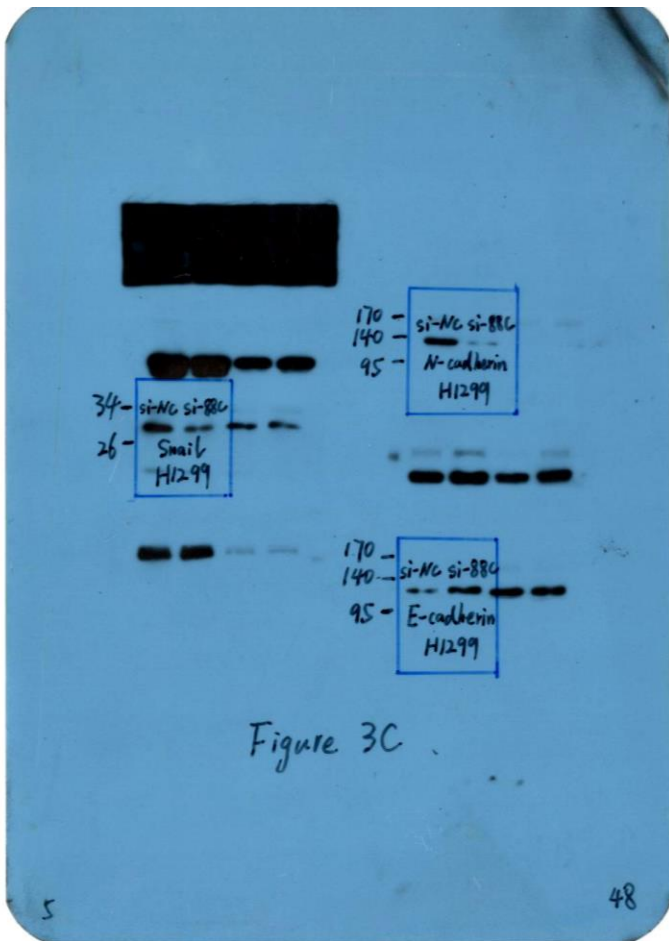

Figure 3C

5

48

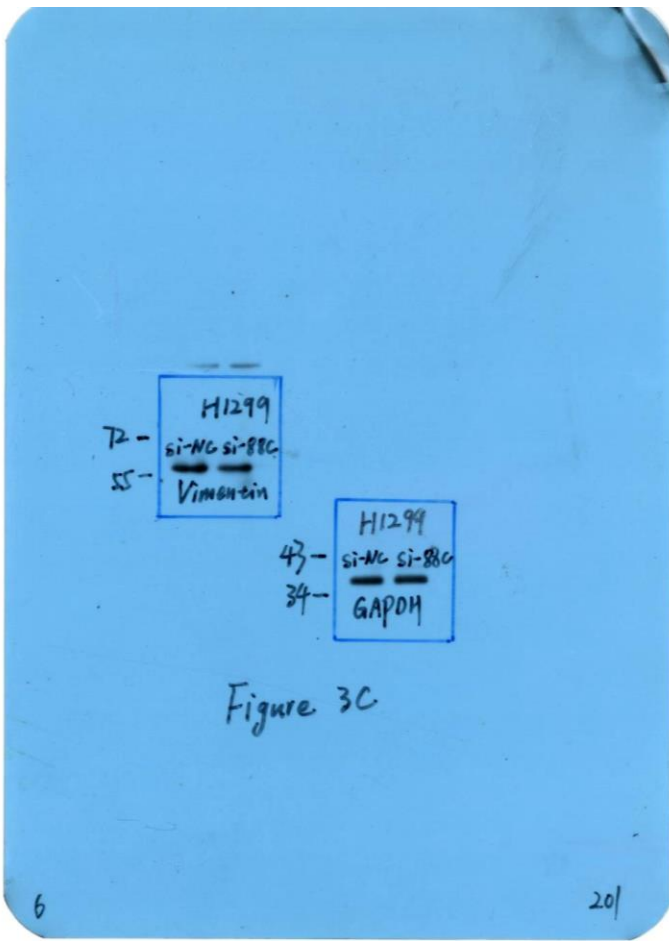

Figure 3C

6

201

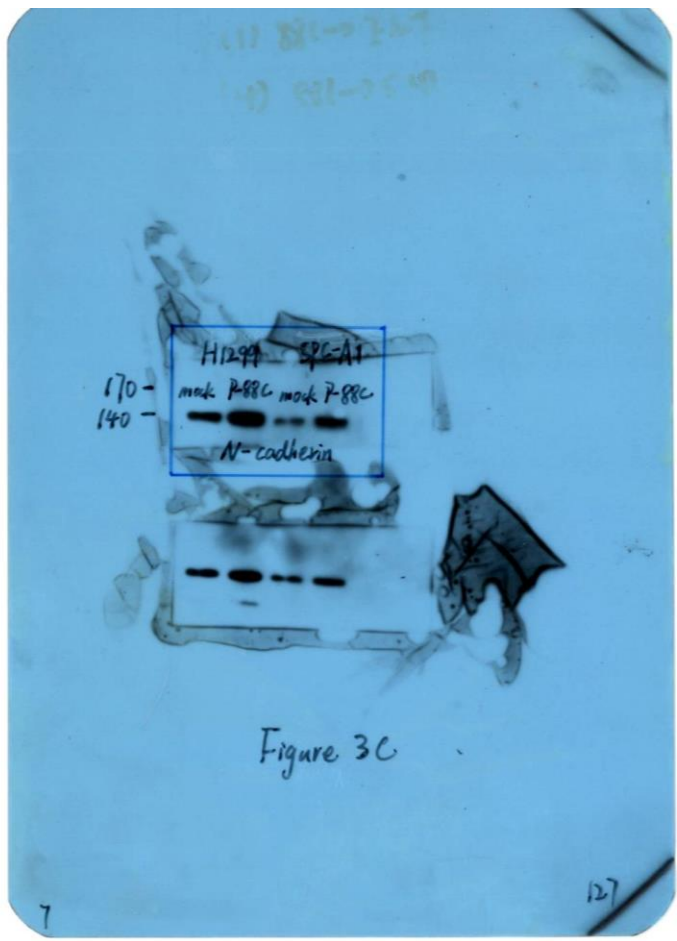

Figure 3C

7

127

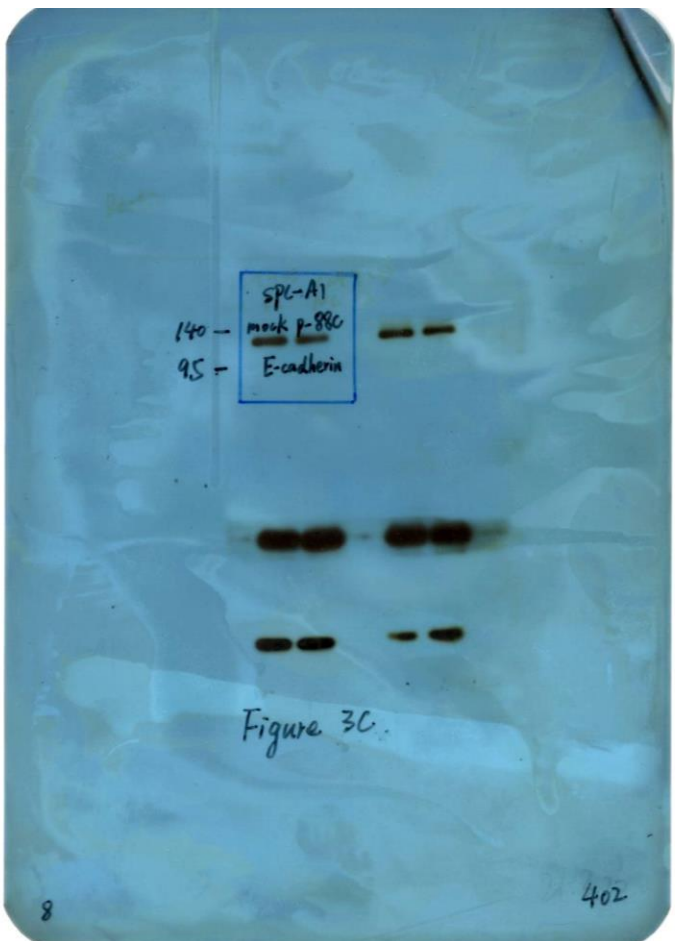

Figure 3C

8

402

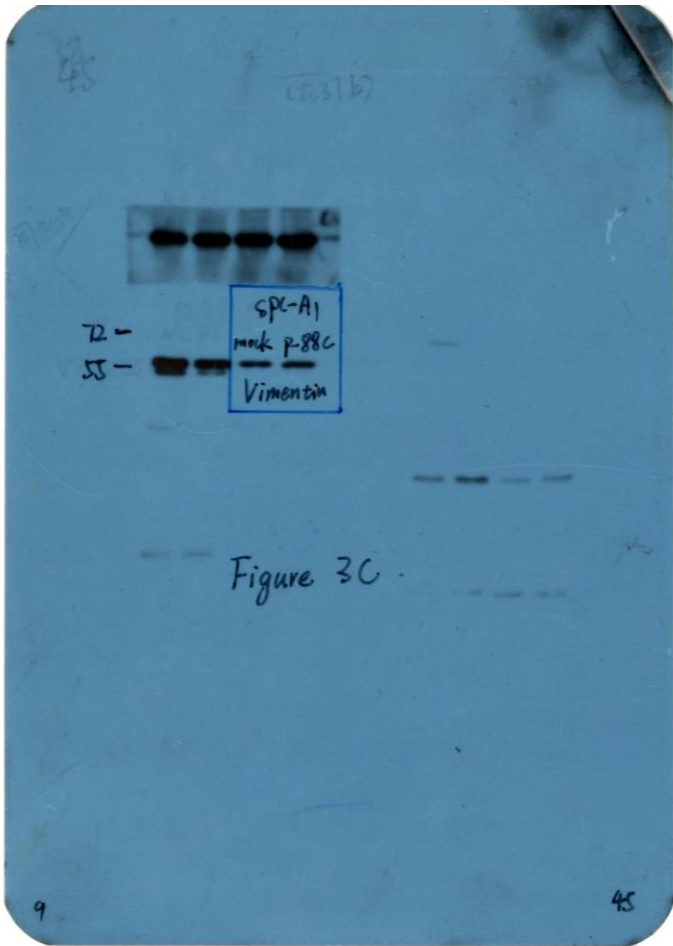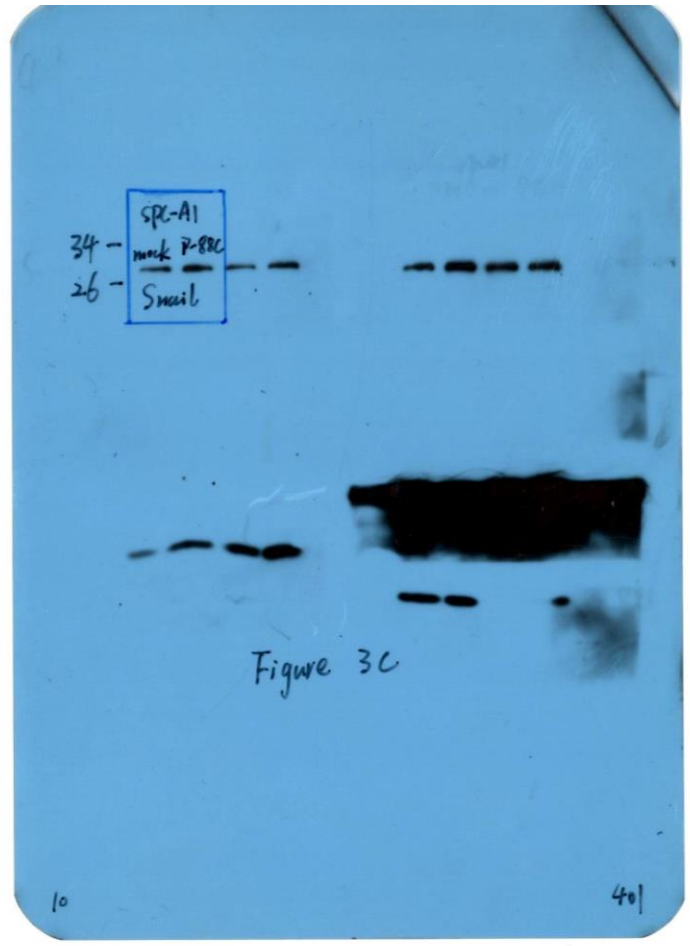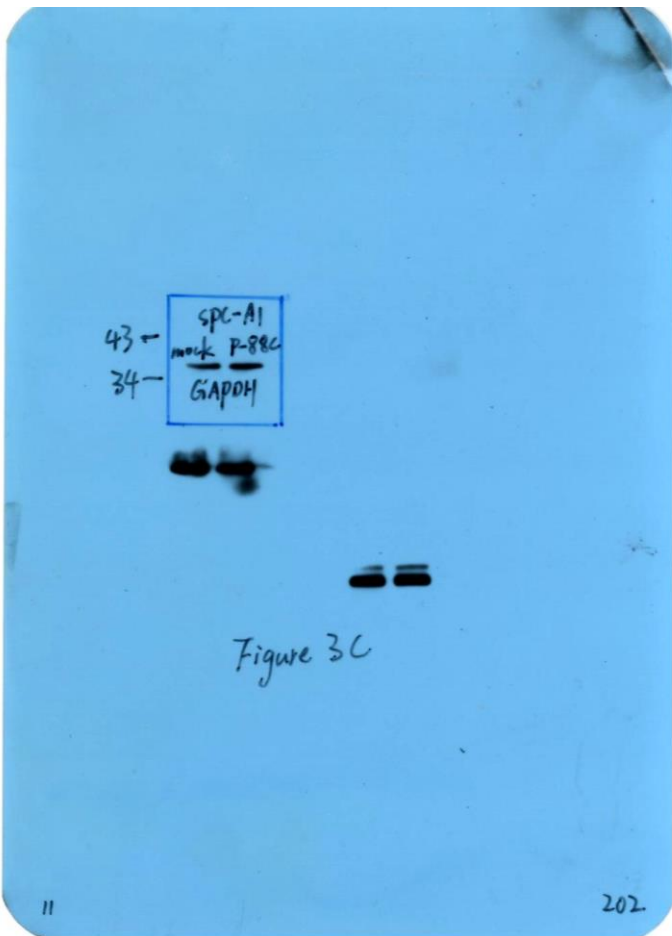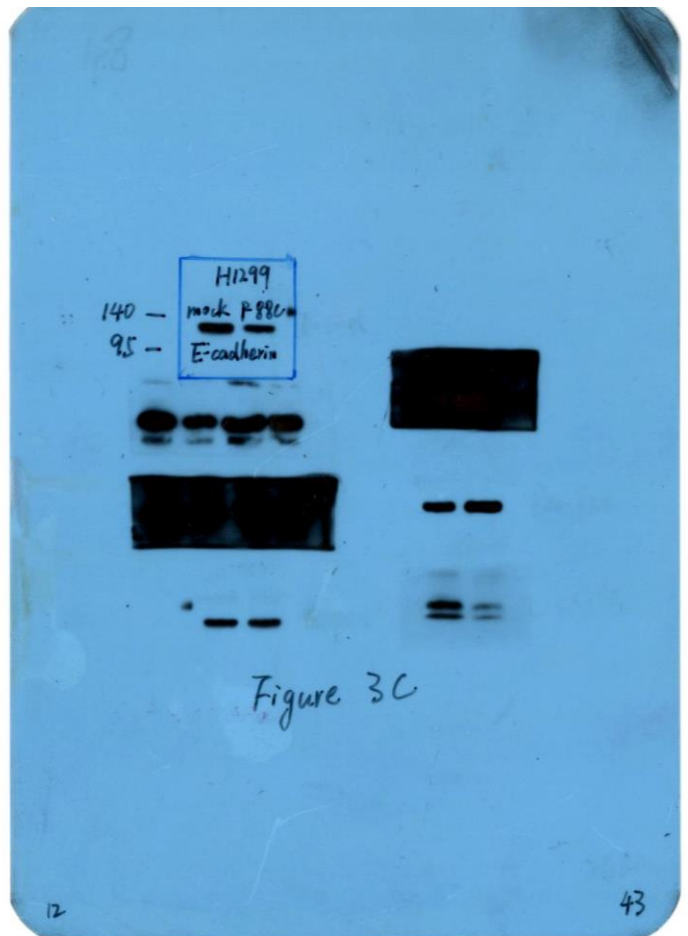



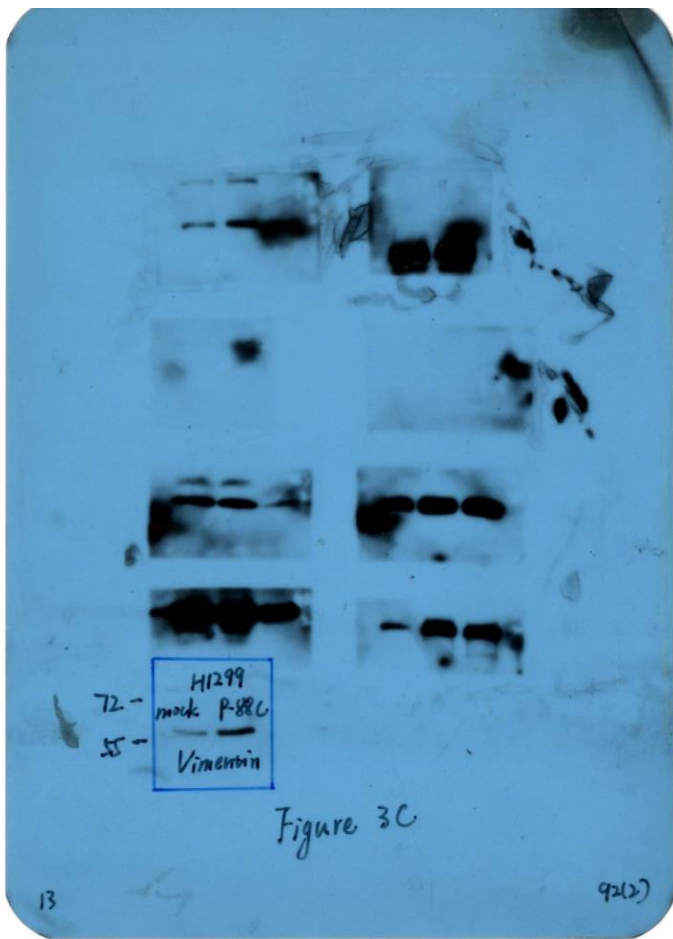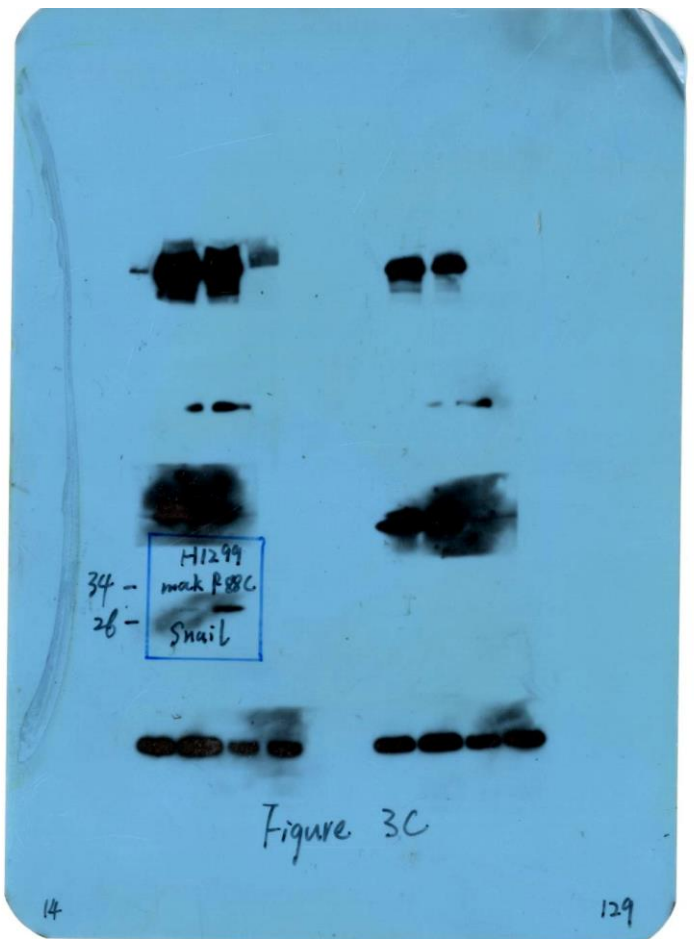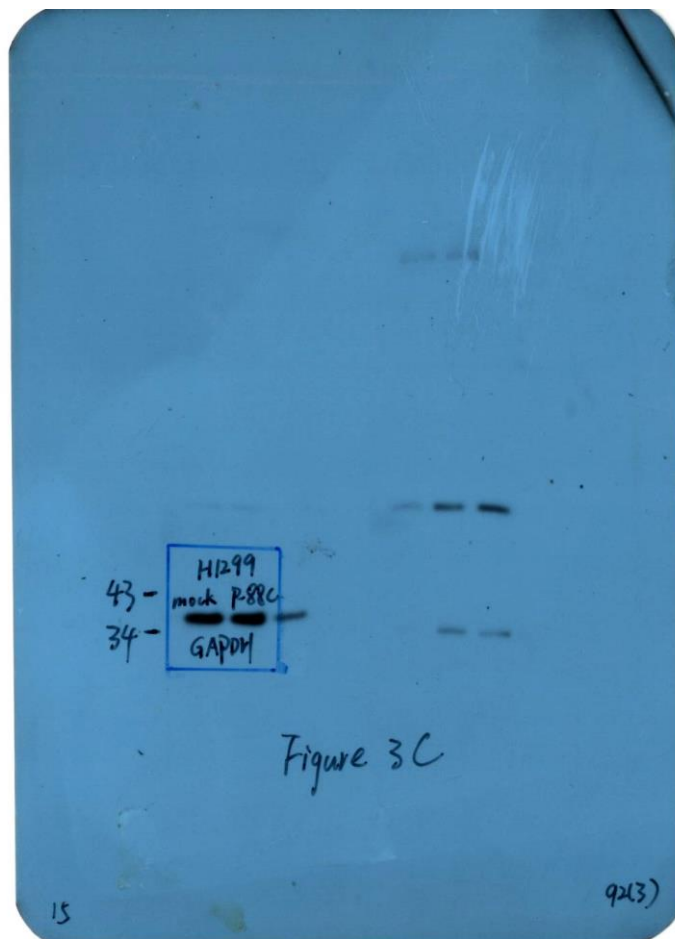

Supplement: 41418_2022_1087_MOESM12_ESM.pdf [file 41418_2022_1087_MOESM12_ESM.pdf]

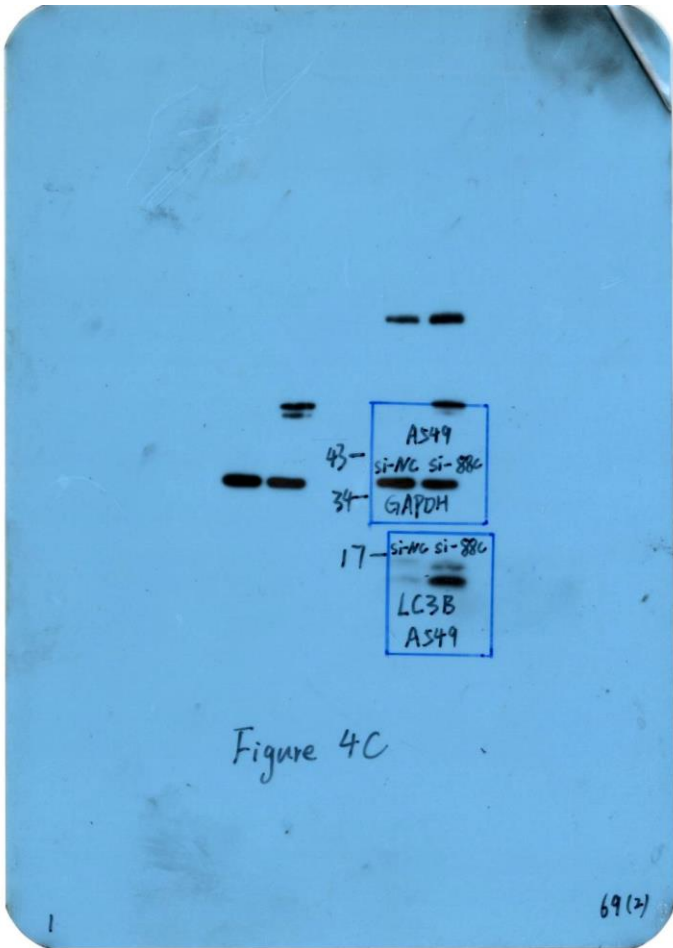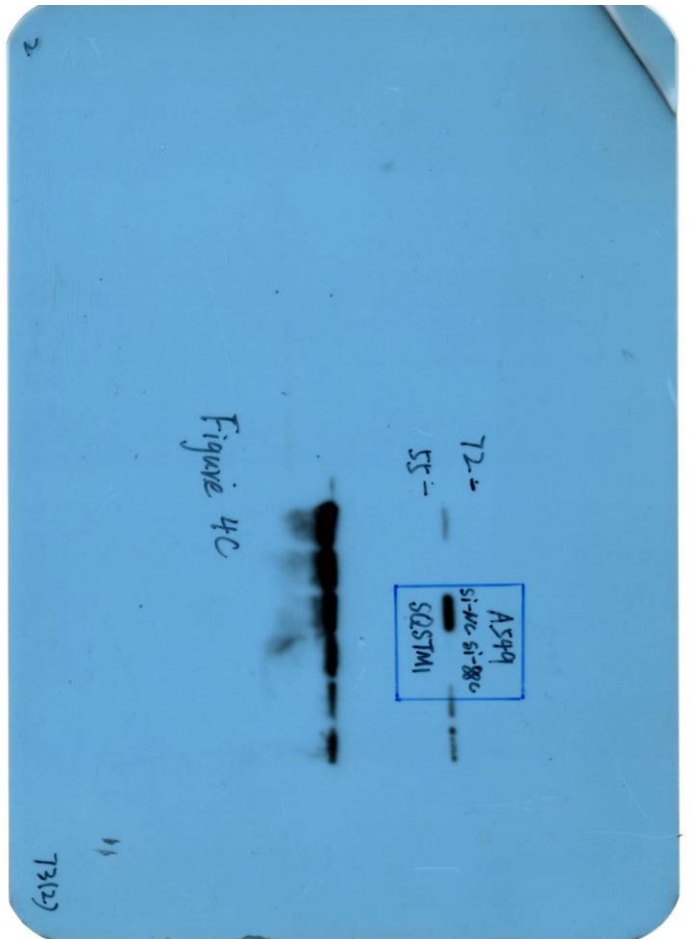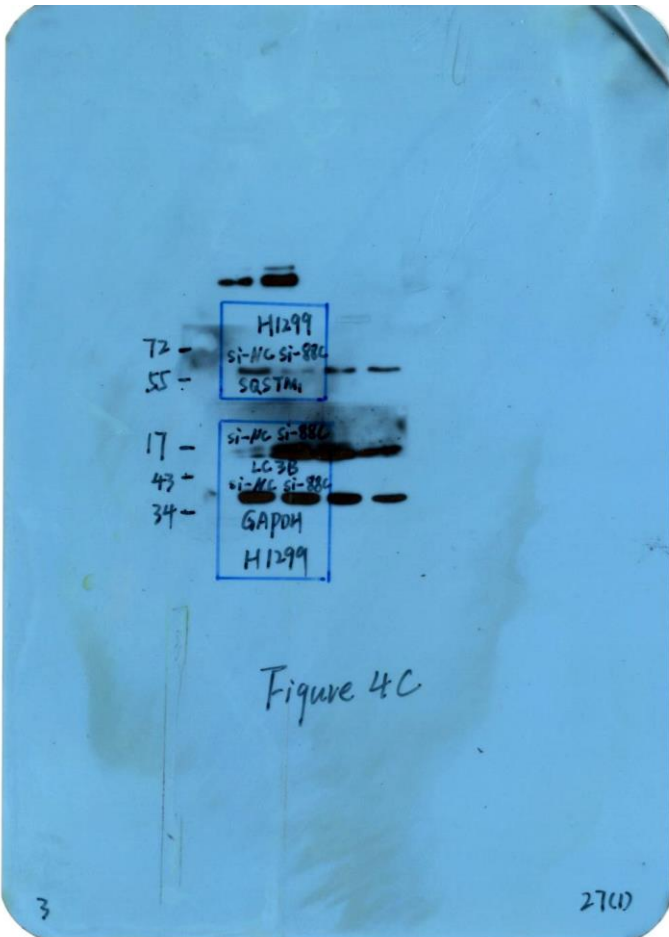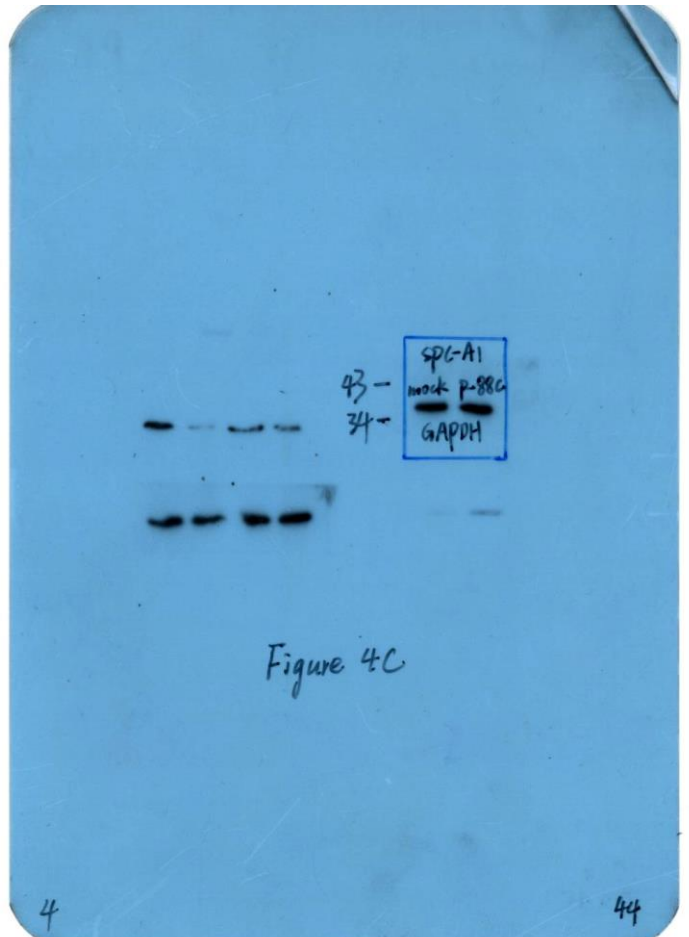

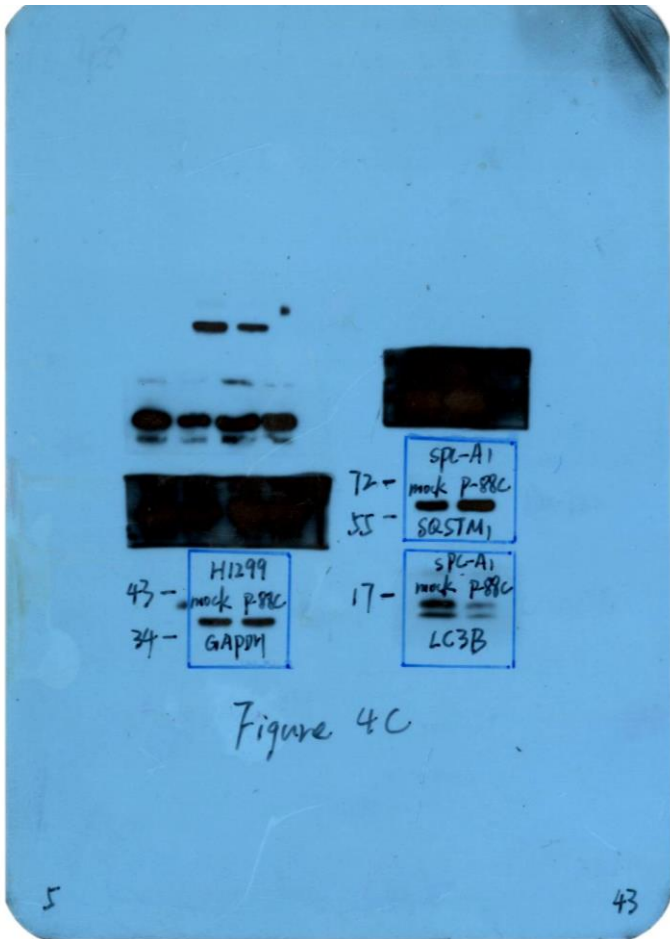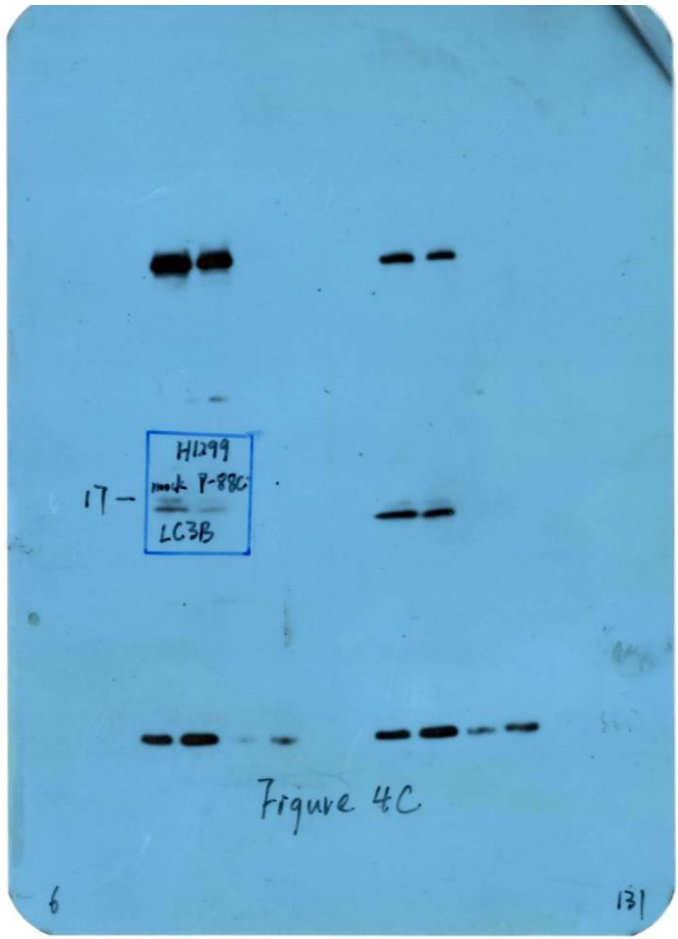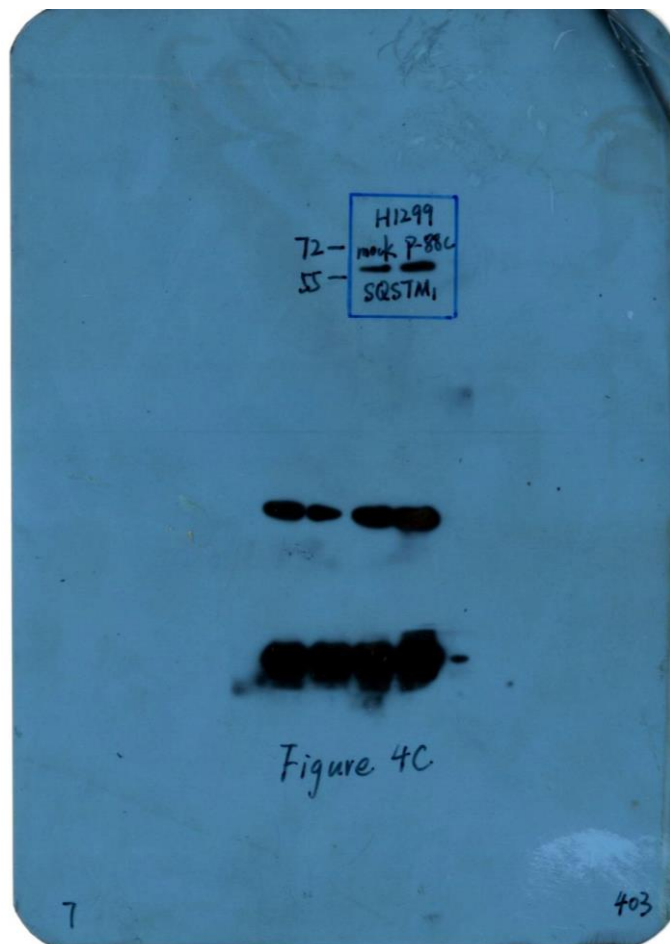

Supplement: 41418_2022_1087_MOESM13_ESM.pdf [file 41418_2022_1087_MOESM13_ESM.pdf]

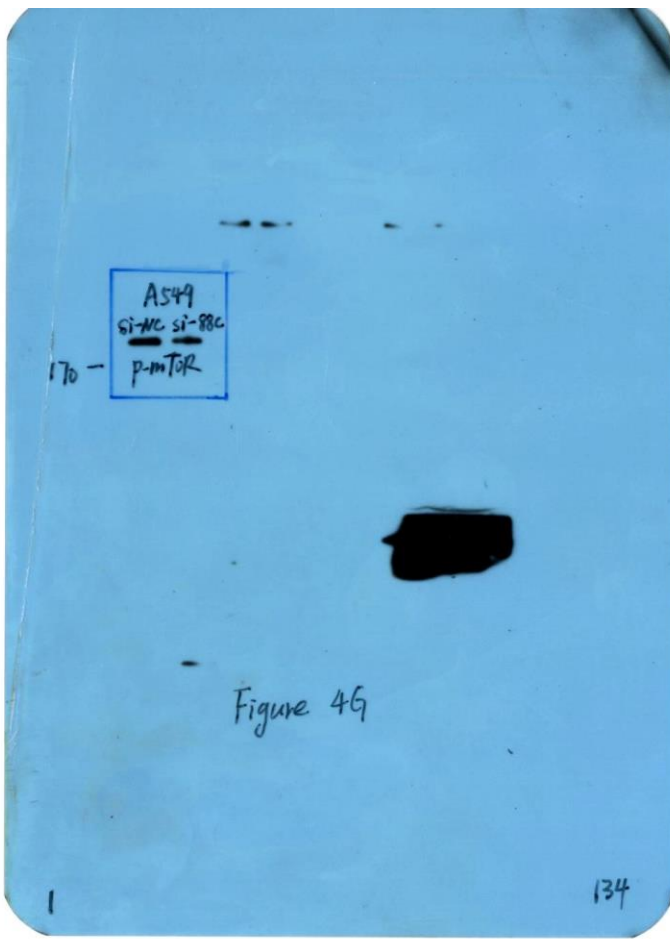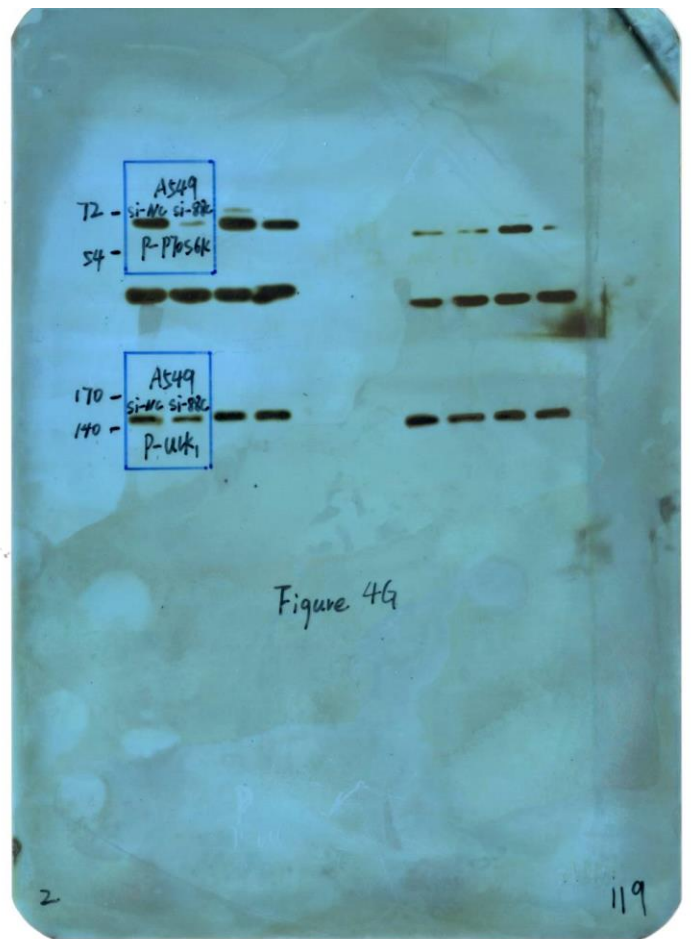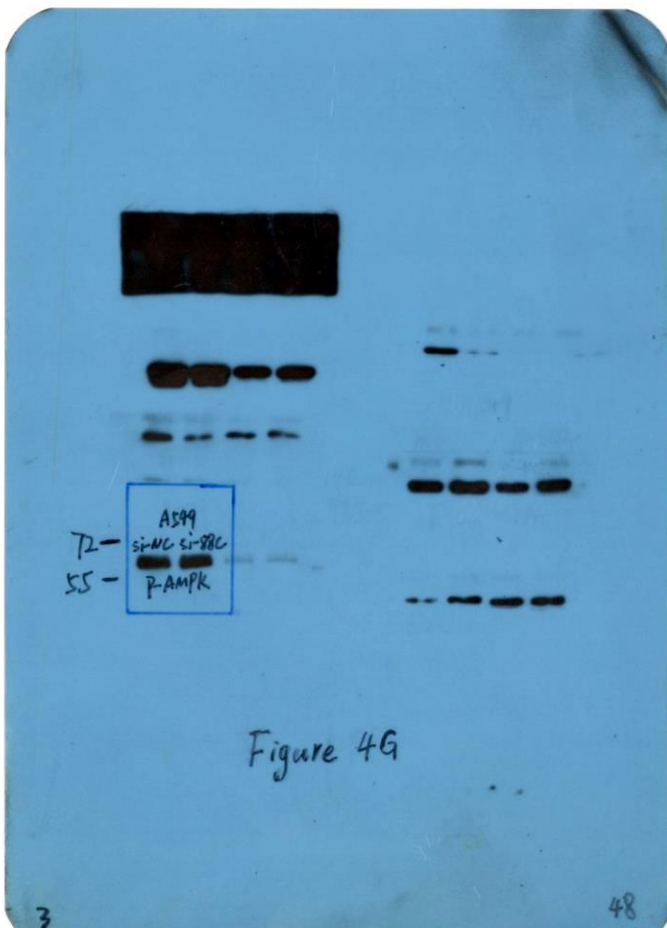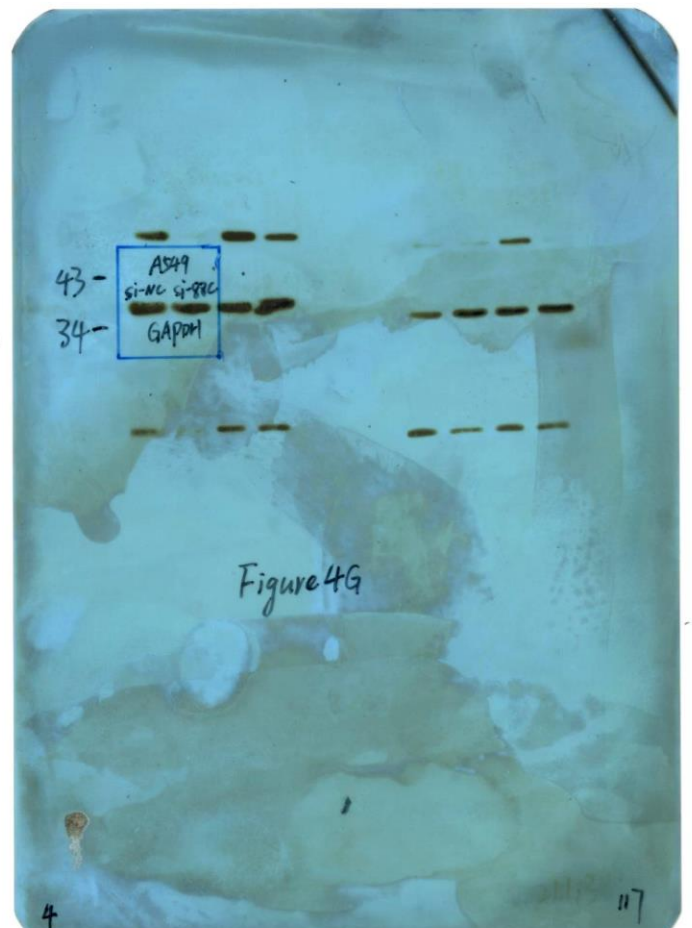

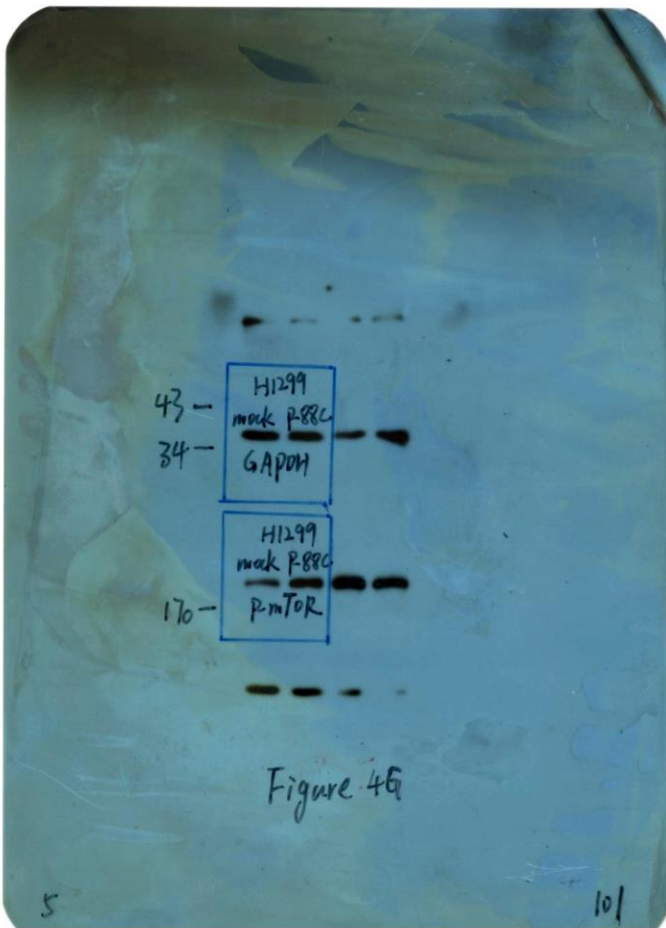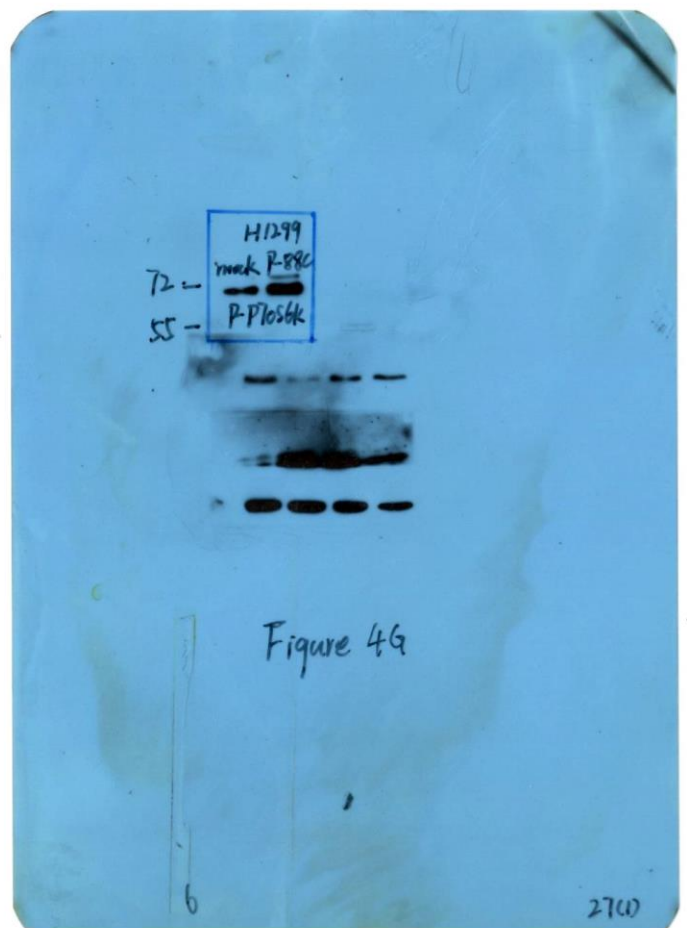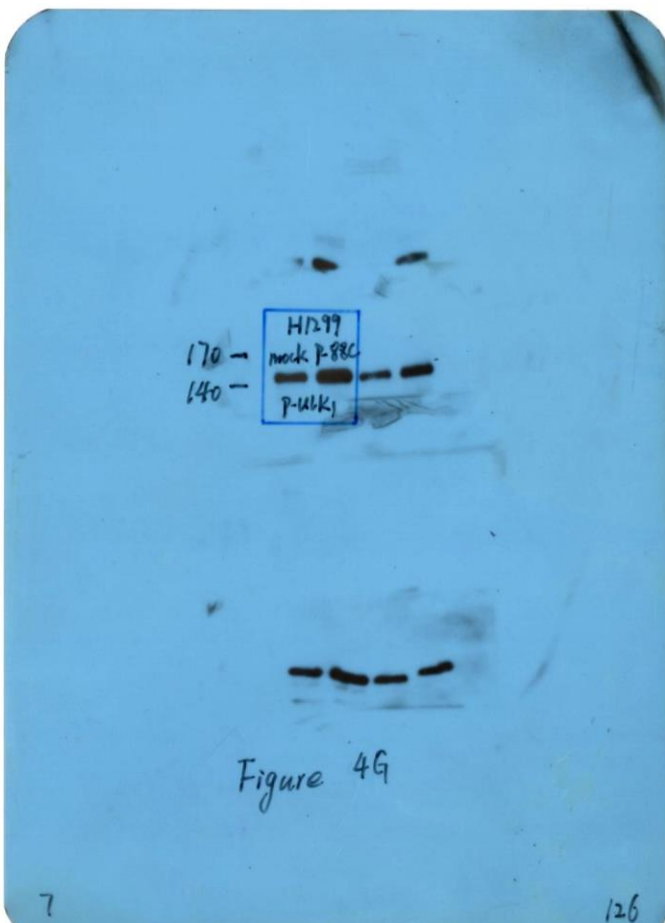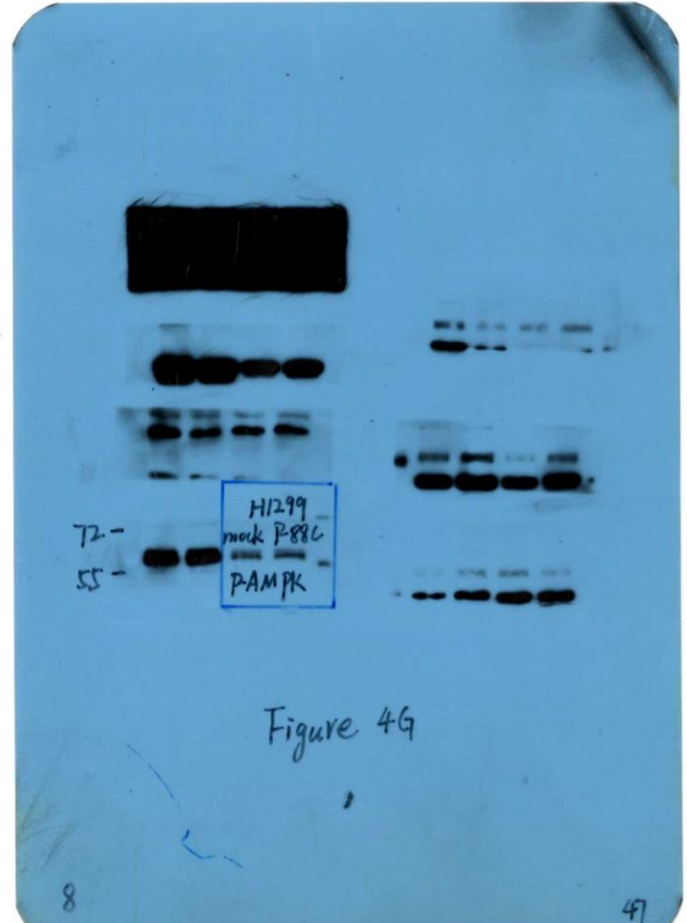

Supplement: 41418_2022_1087_MOESM14_ESM.pdf [file 41418_2022_1087_MOESM14_ESM.pdf]

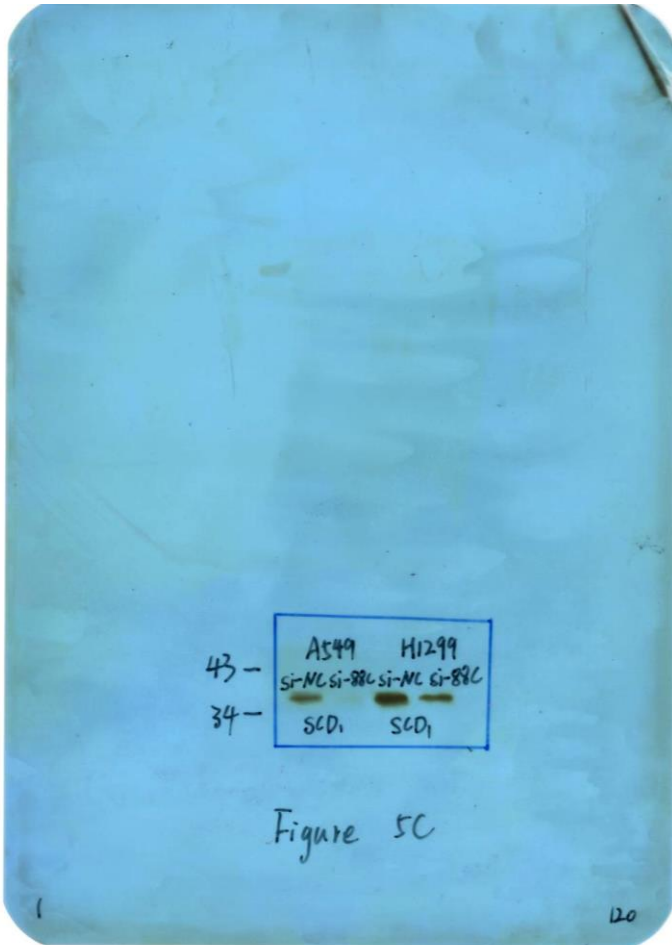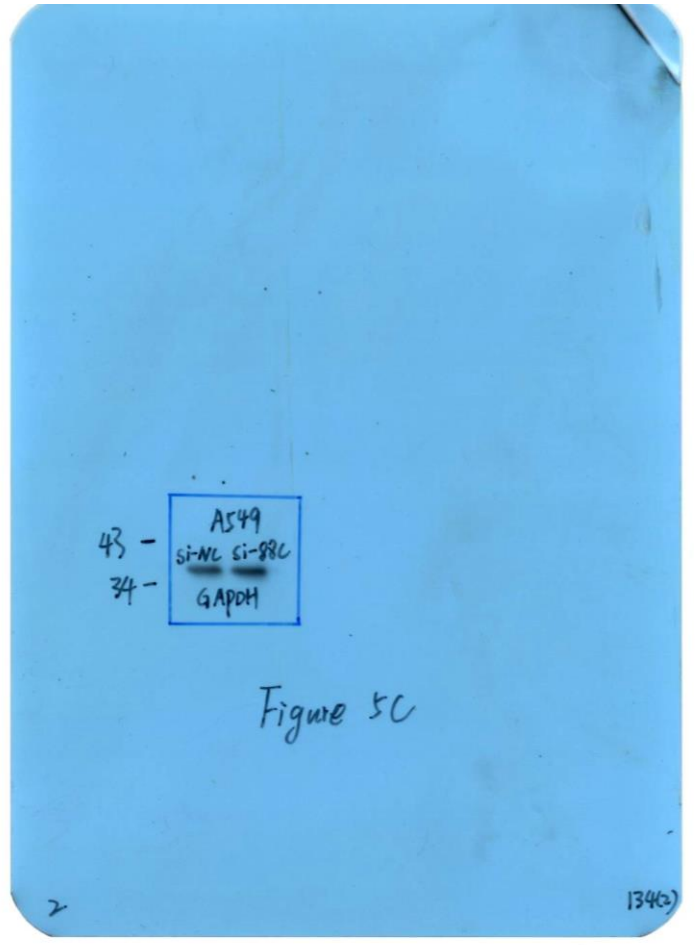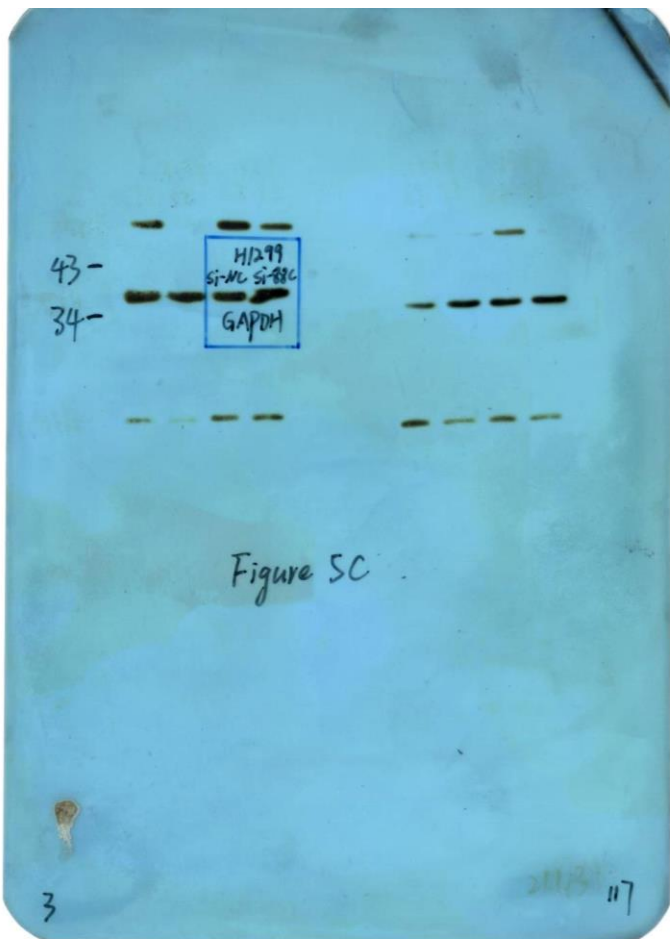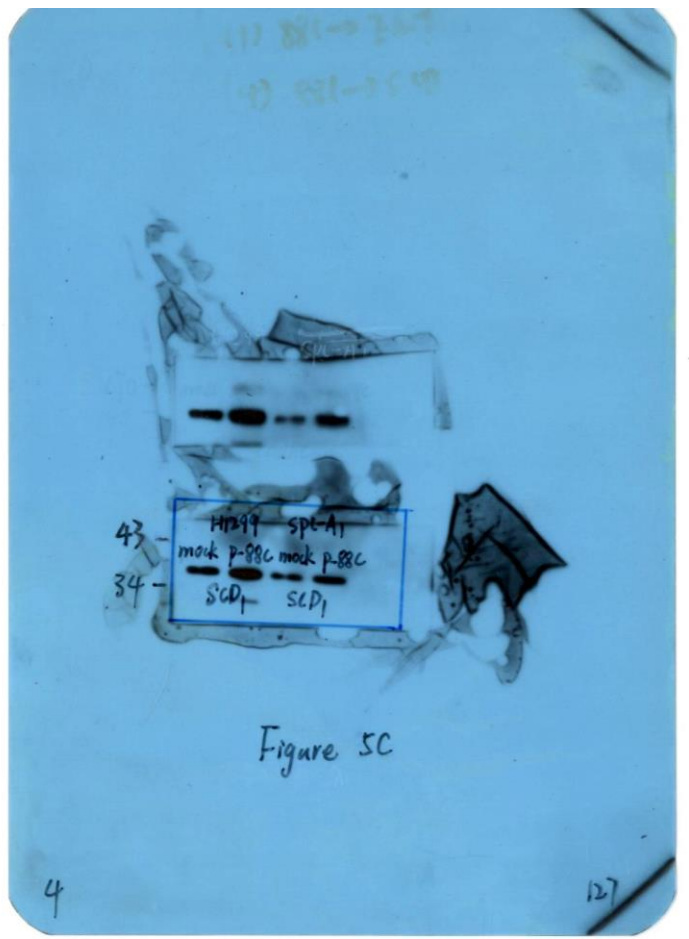

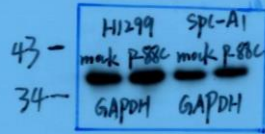

Figure 5C

Supplement: 41418_2022_1087_MOESM15_ESM.pdf [file 41418_2022_1087_MOESM15_ESM.pdf]

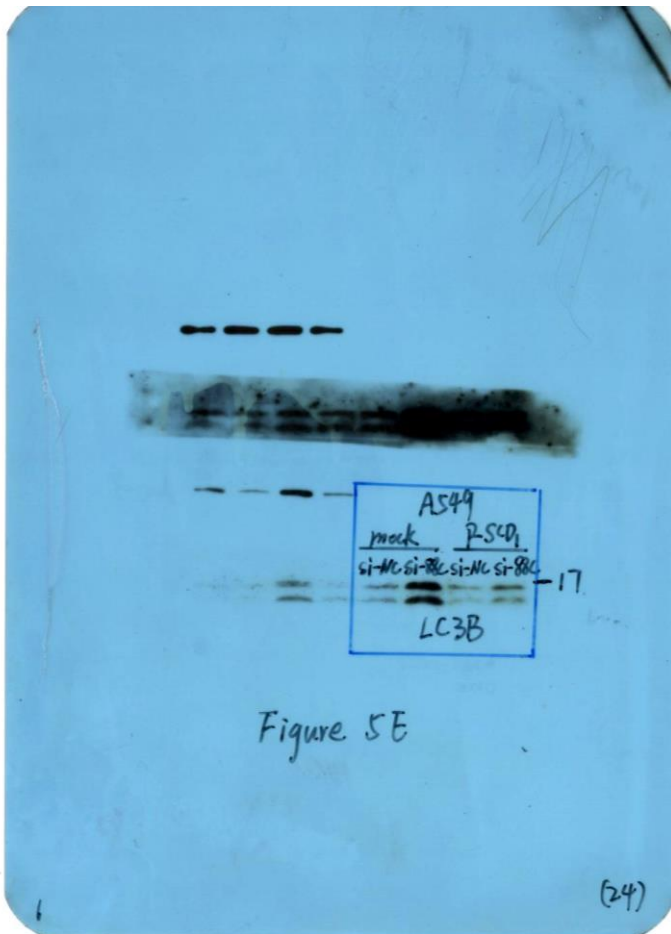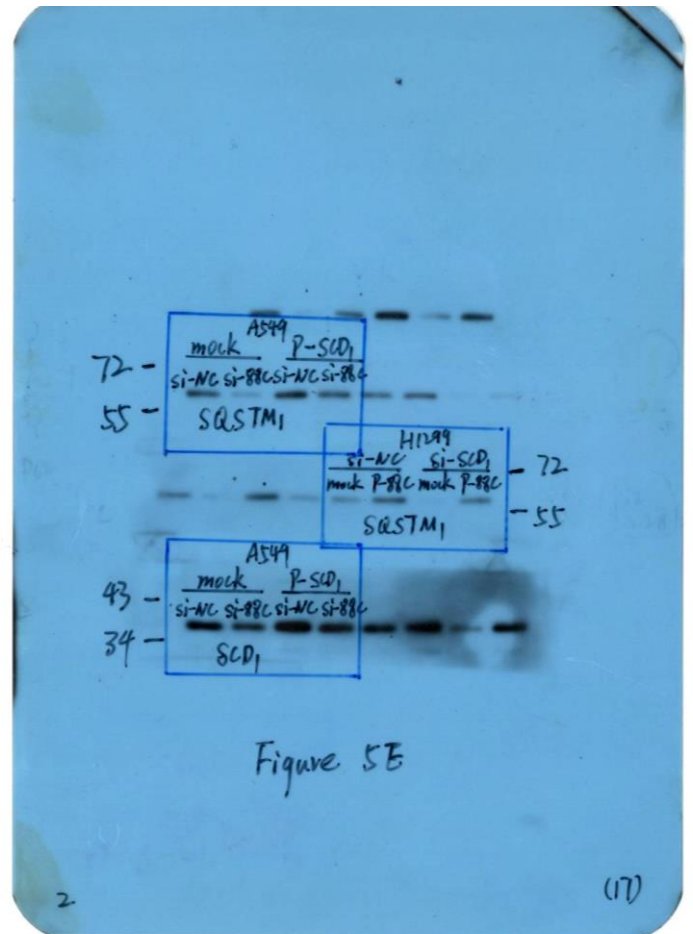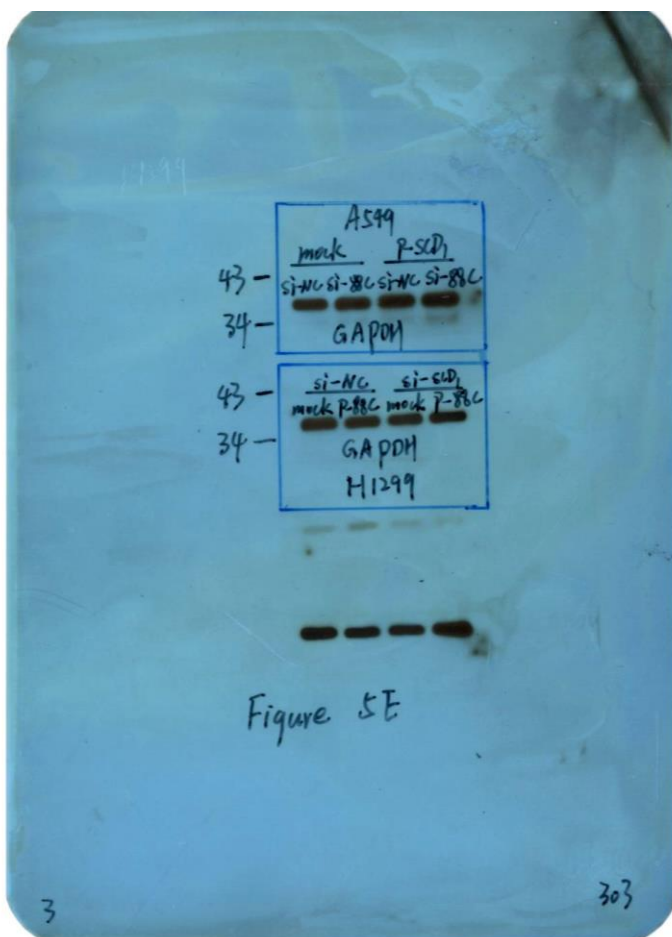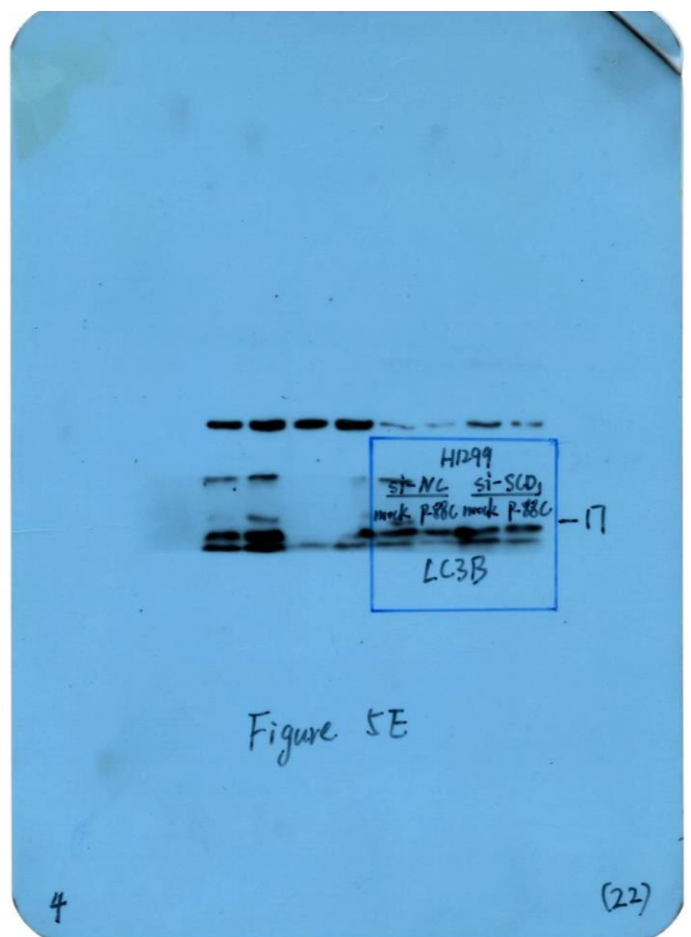

Supplement: 41418_2022_1087_MOESM16_ESM.pdf [file 41418_2022_1087_MOESM16_ESM.pdf]

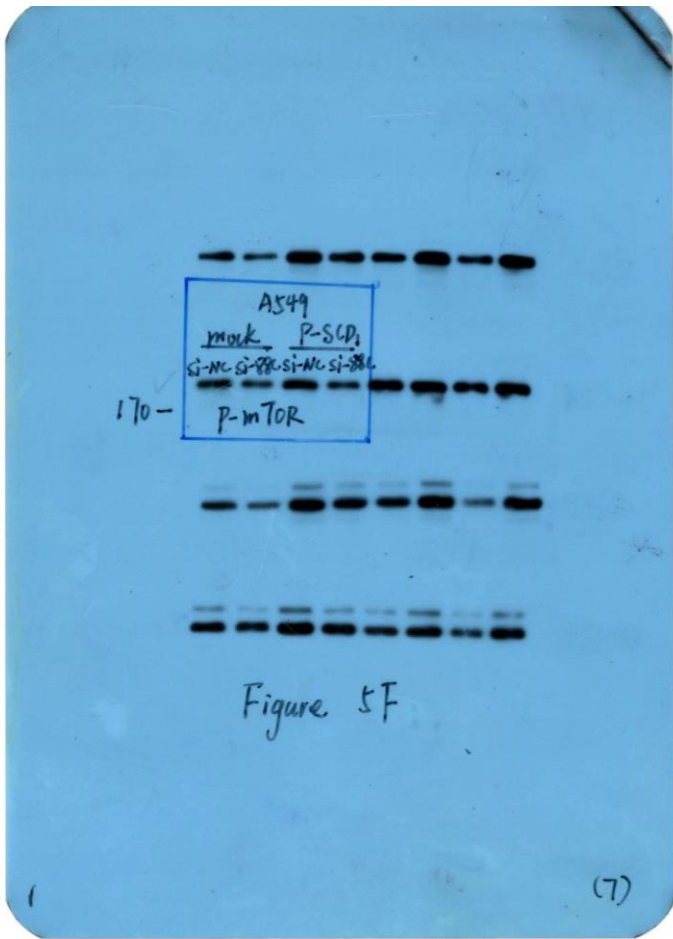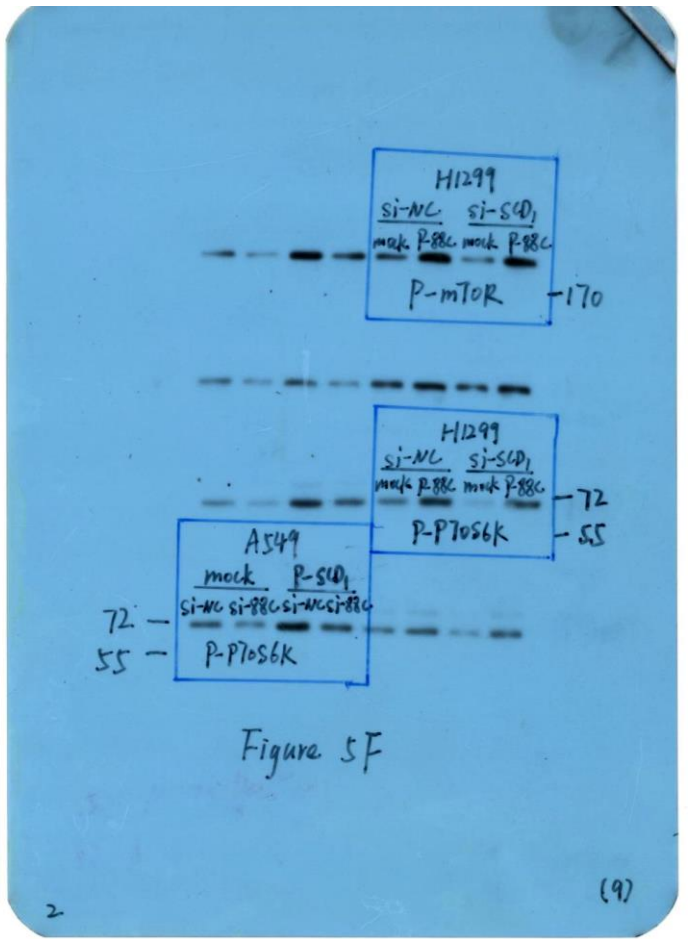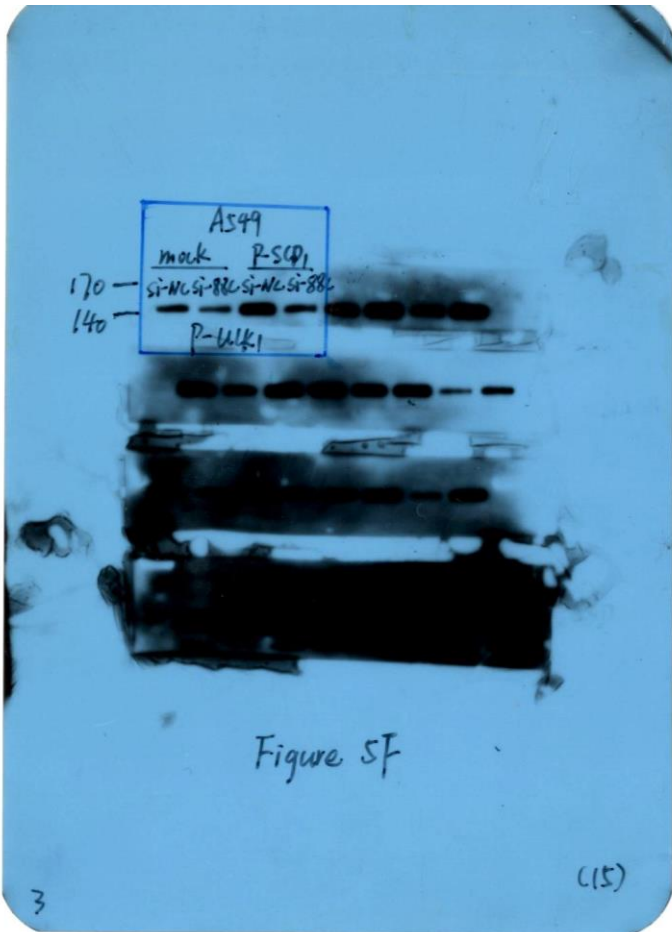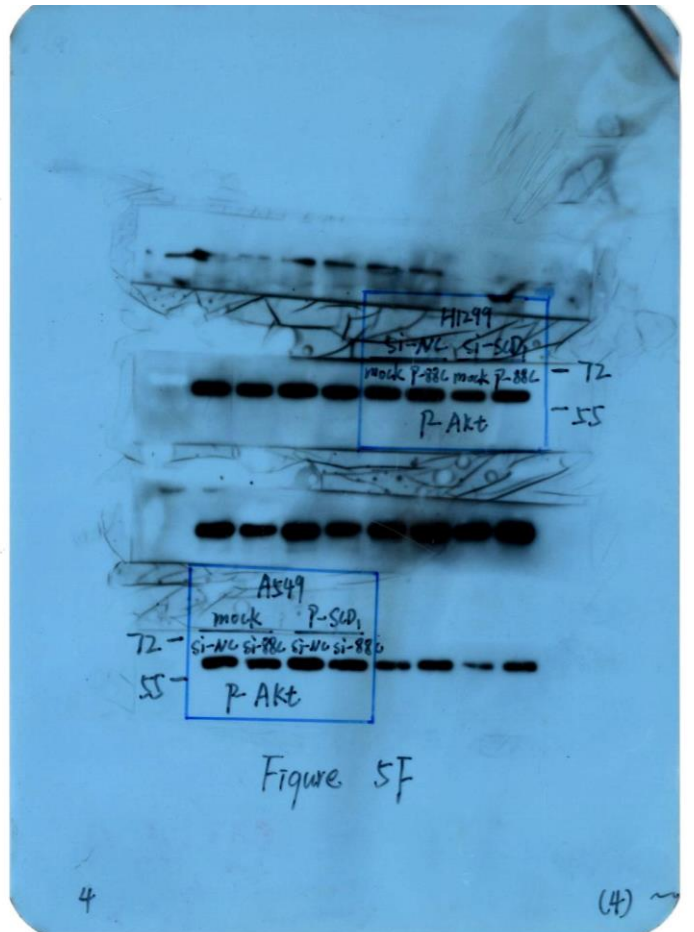

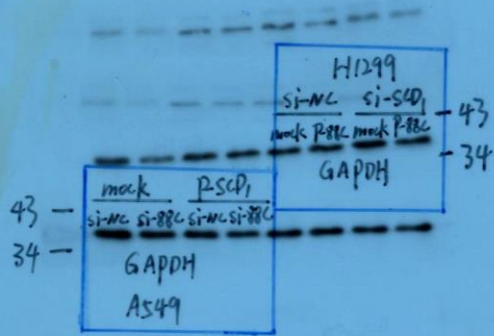

Figure 5F

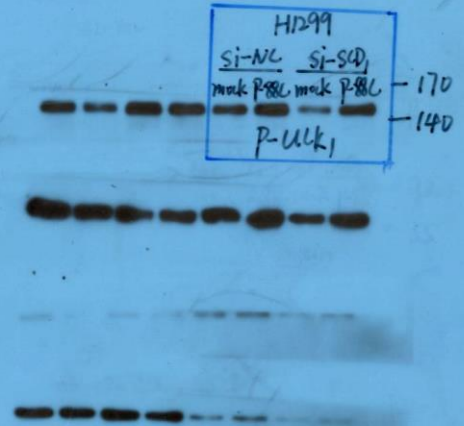

Figure 5F

Supplement: 41418_2022_1087_MOESM17_ESM.pdf [file 41418_2022_1087_MOESM17_ESM.pdf]

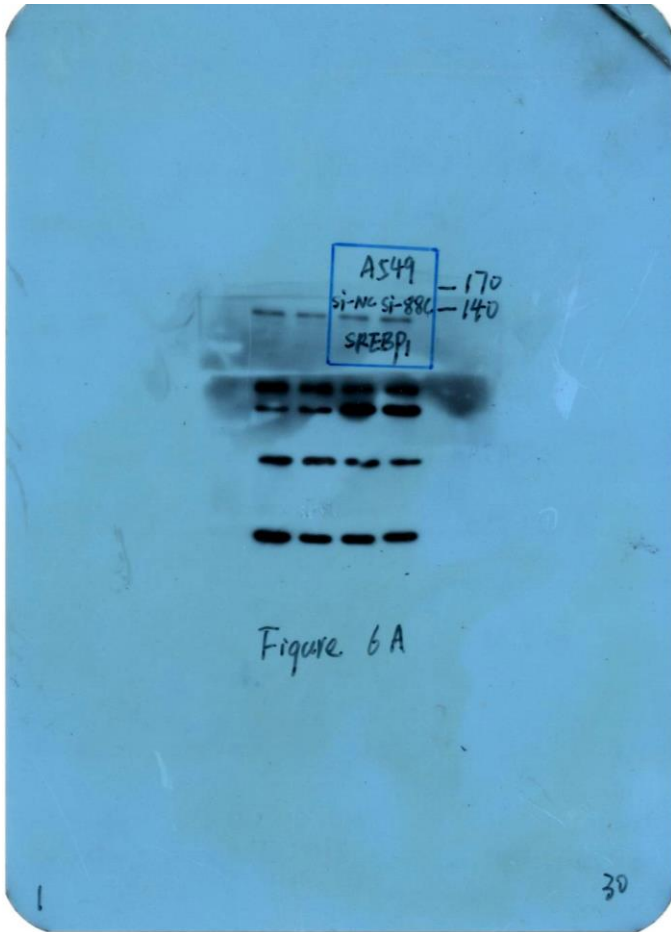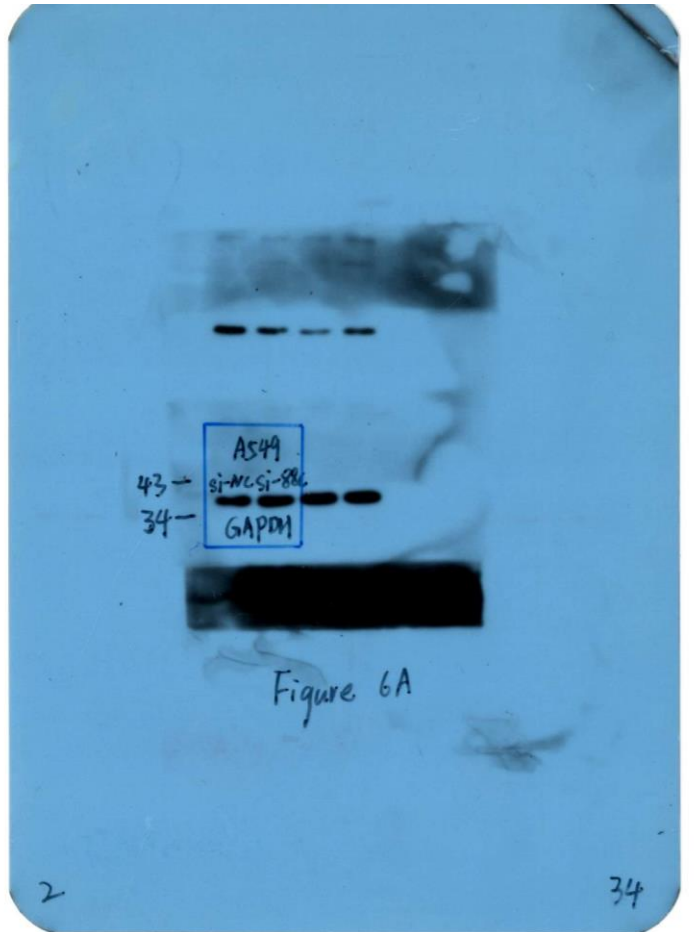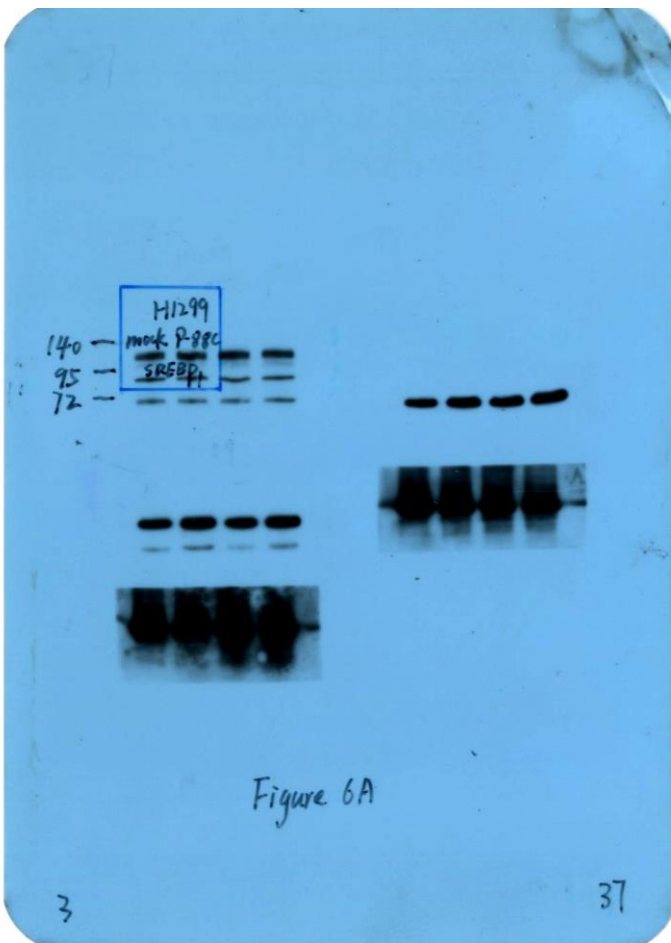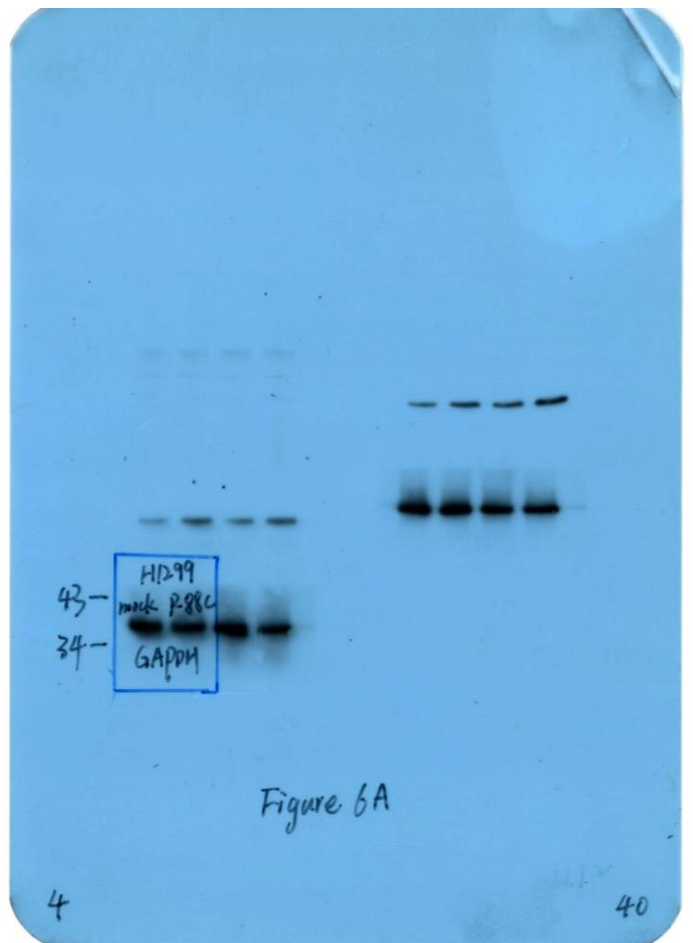

Supplement: 41418_2022_1087_MOESM18_ESM.pdf [file 41418_2022_1087_MOESM18_ESM.pdf]

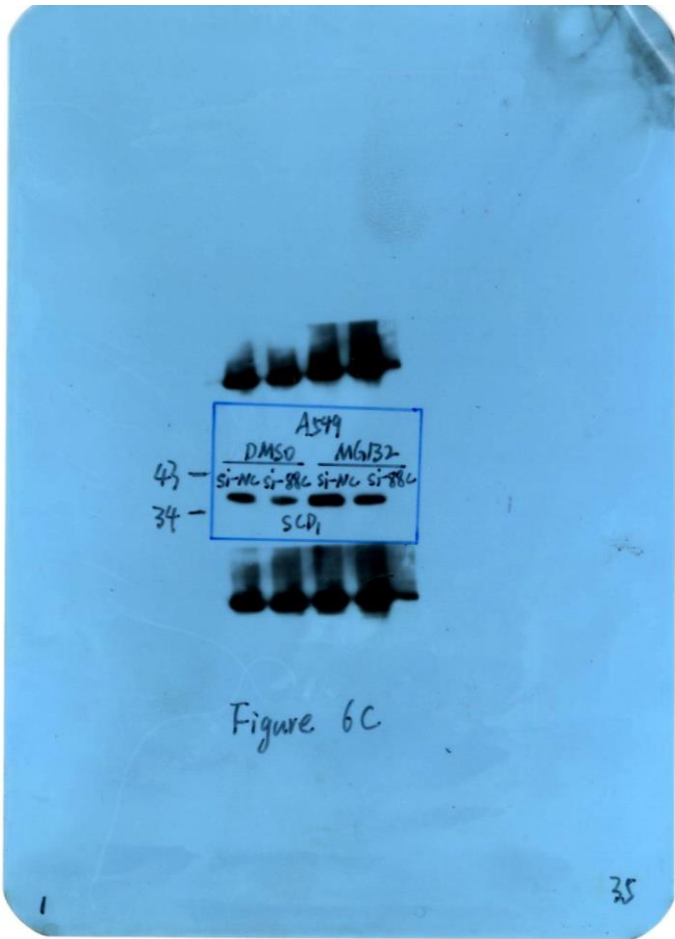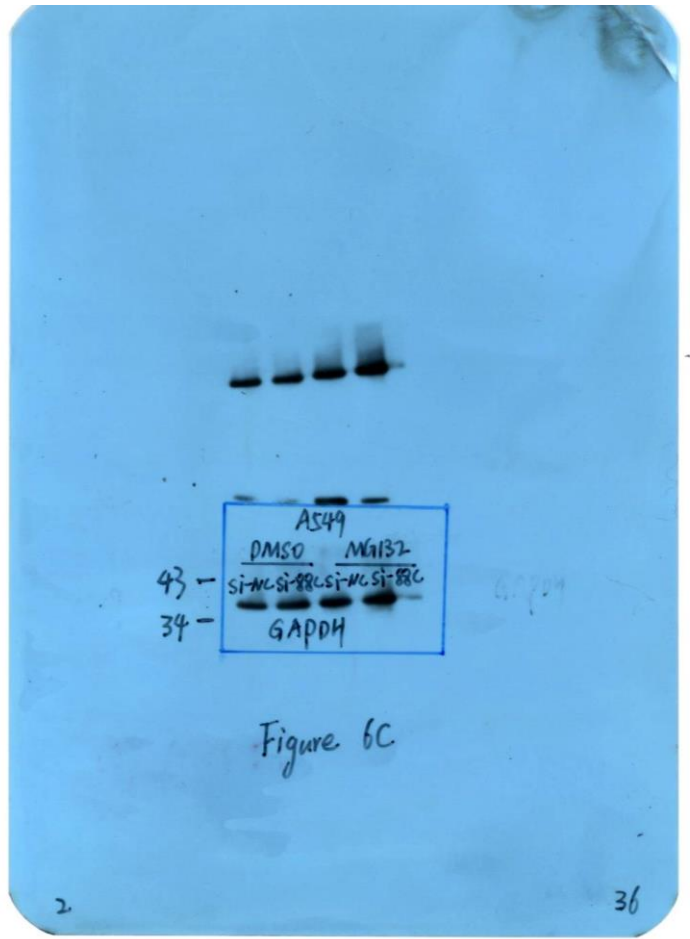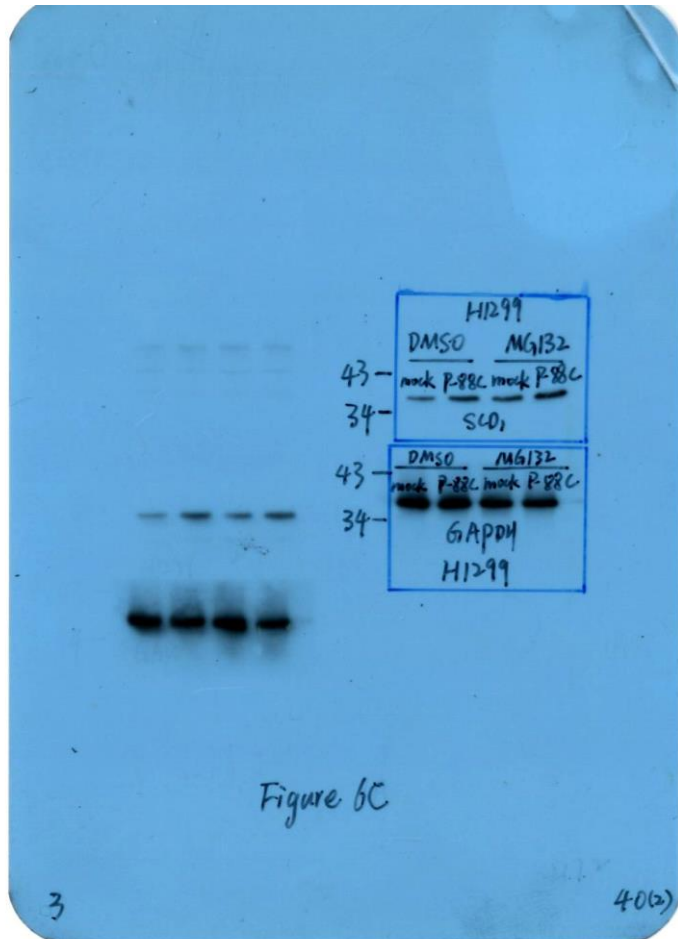

Supplement: 41418_2022_1087_MOESM19_ESM.pdf [file 41418_2022_1087_MOESM19_ESM.pdf]

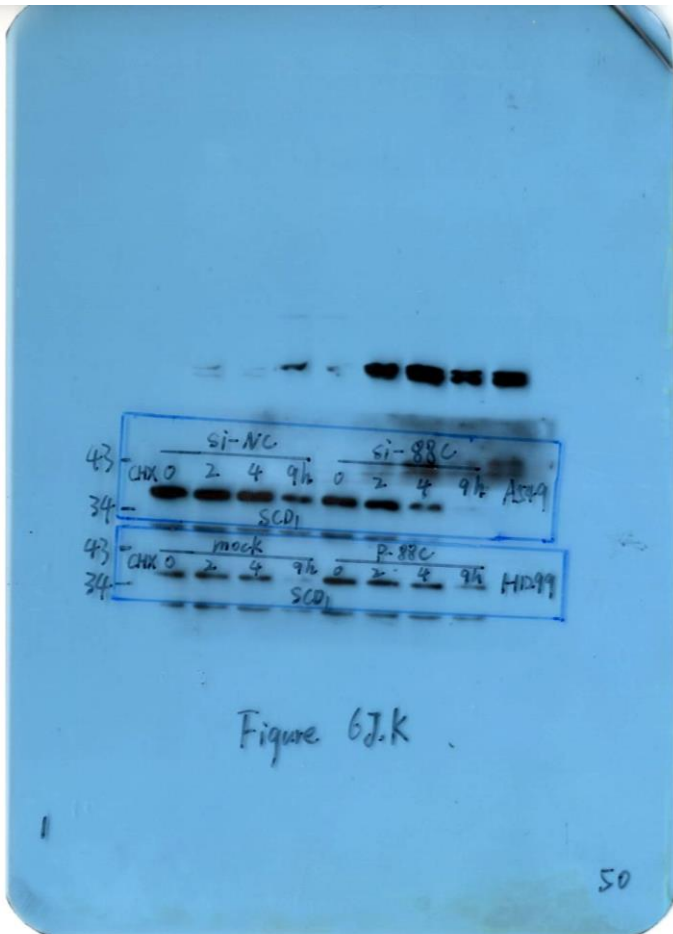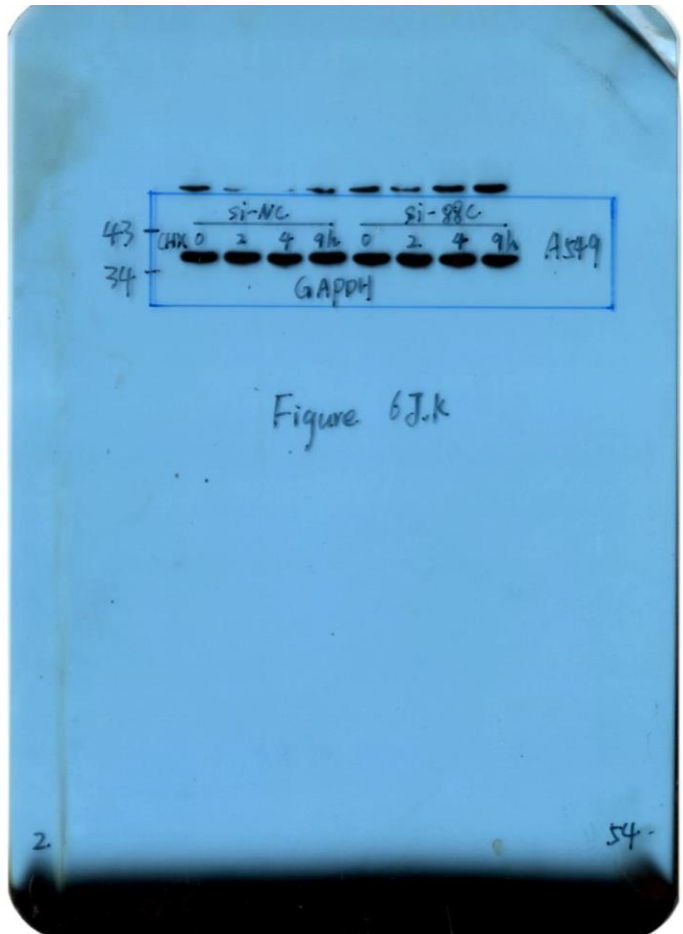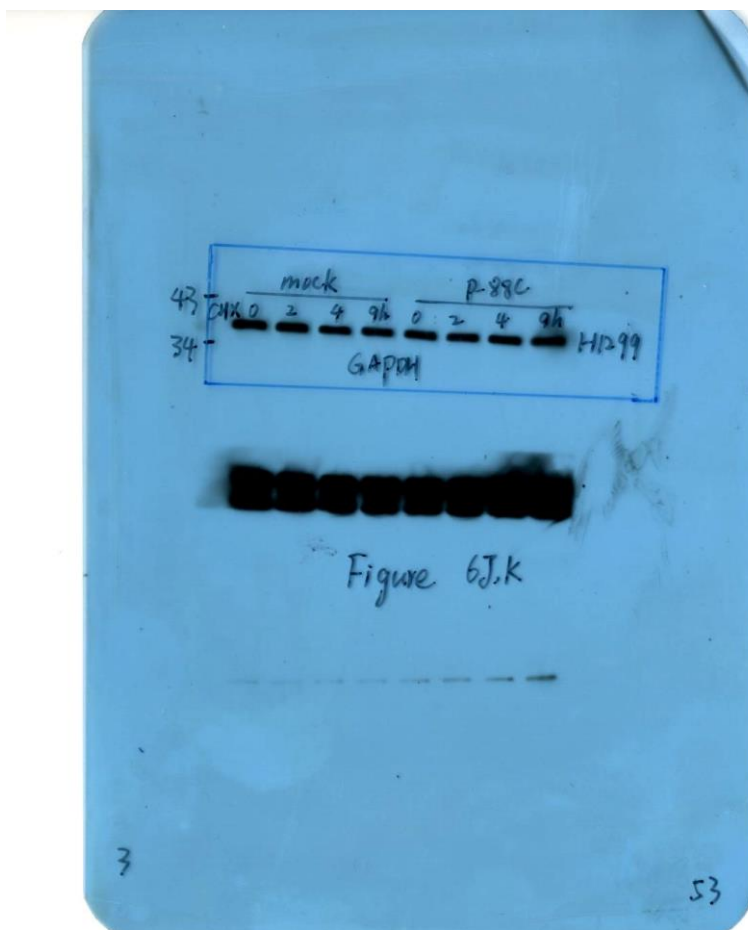

Supplement: 41418_2022_1087_MOESM20_ESM.pdf [file 41418_2022_1087_MOESM20_ESM.pdf]

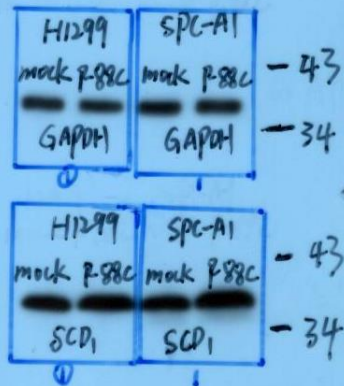

Figure S6D

B(2)

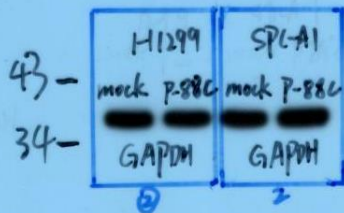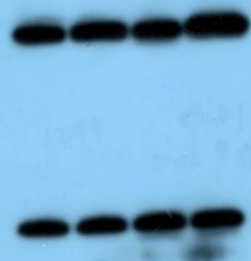

Figure S6D

2

D(1)

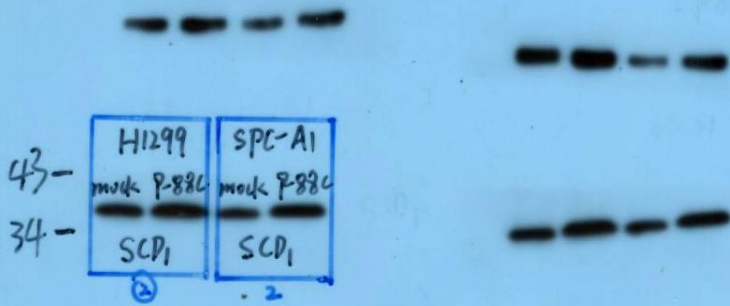

Figure S6D

3

D(3)

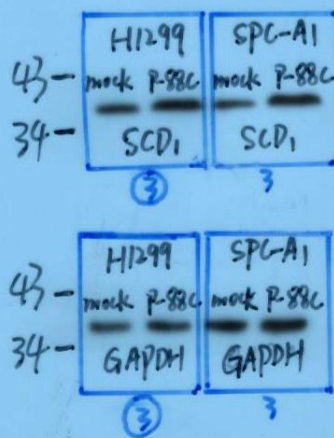

Figure S6D

4

E(2)

Supplement: 41418_2022_1087_MOESM21_ESM.pdf [file 41418_2022_1087_MOESM21_ESM.pdf]

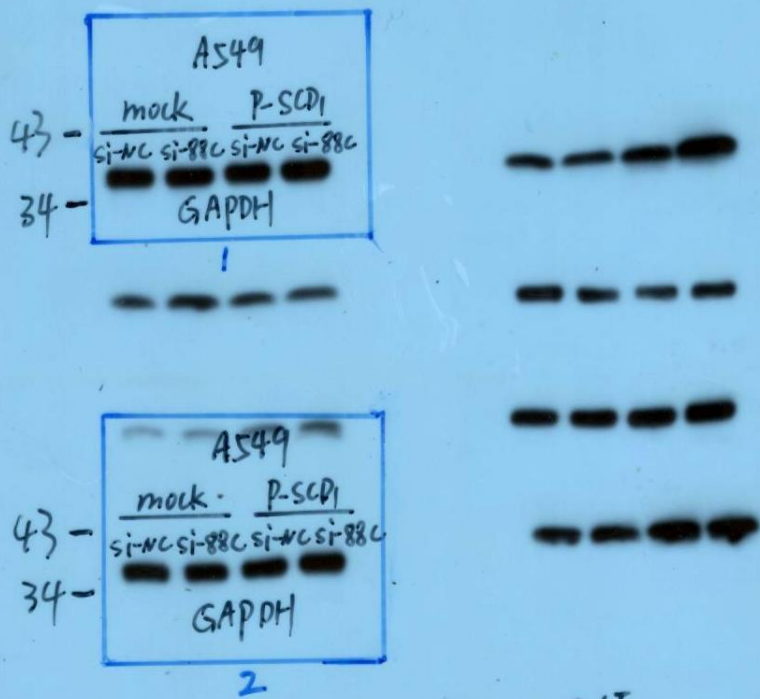

Figure S6F

A(2)

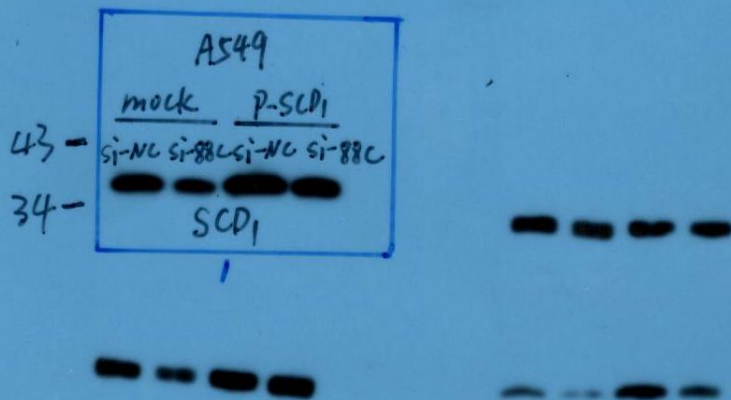

Figure S6F

A(4)

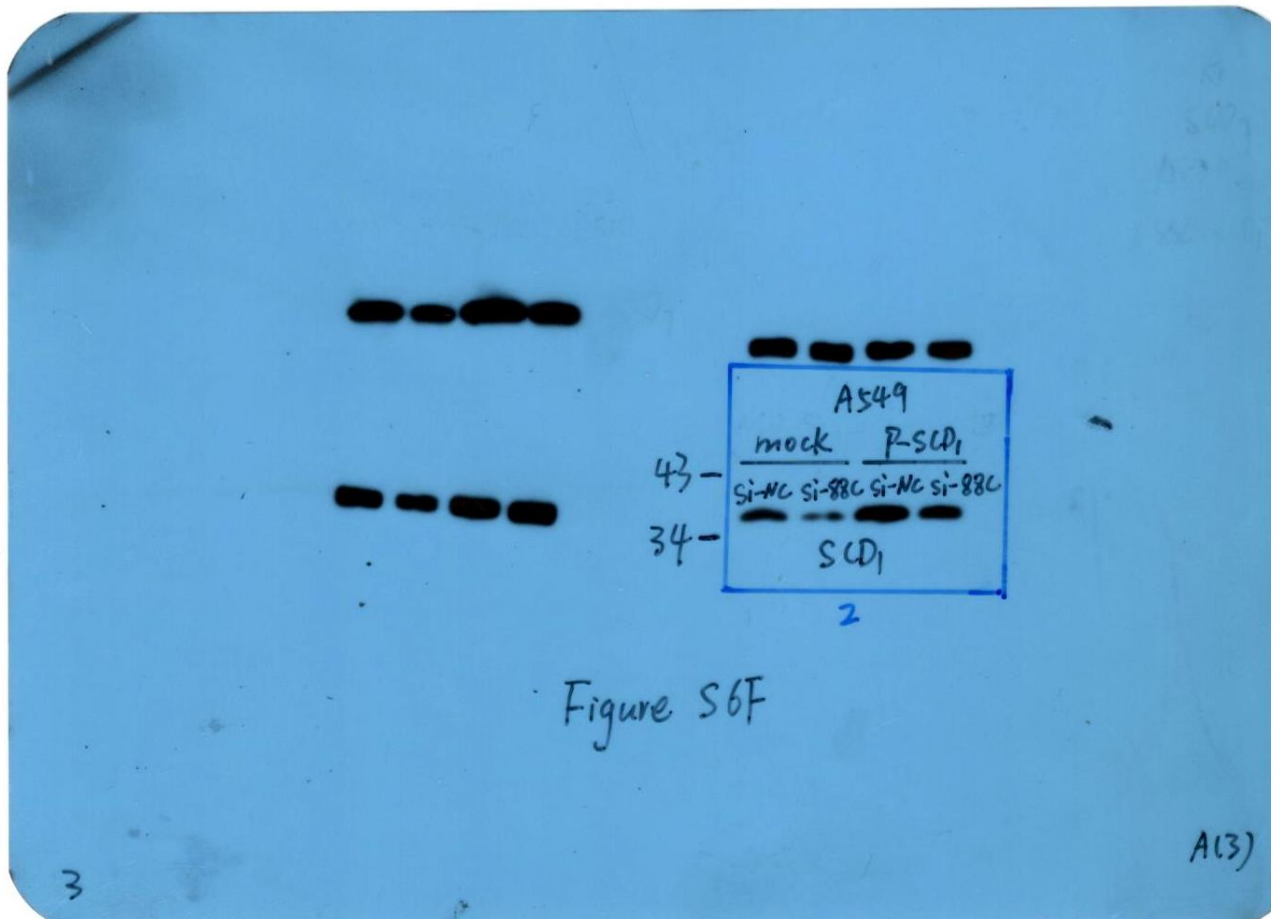

Figure S6F

A(3)

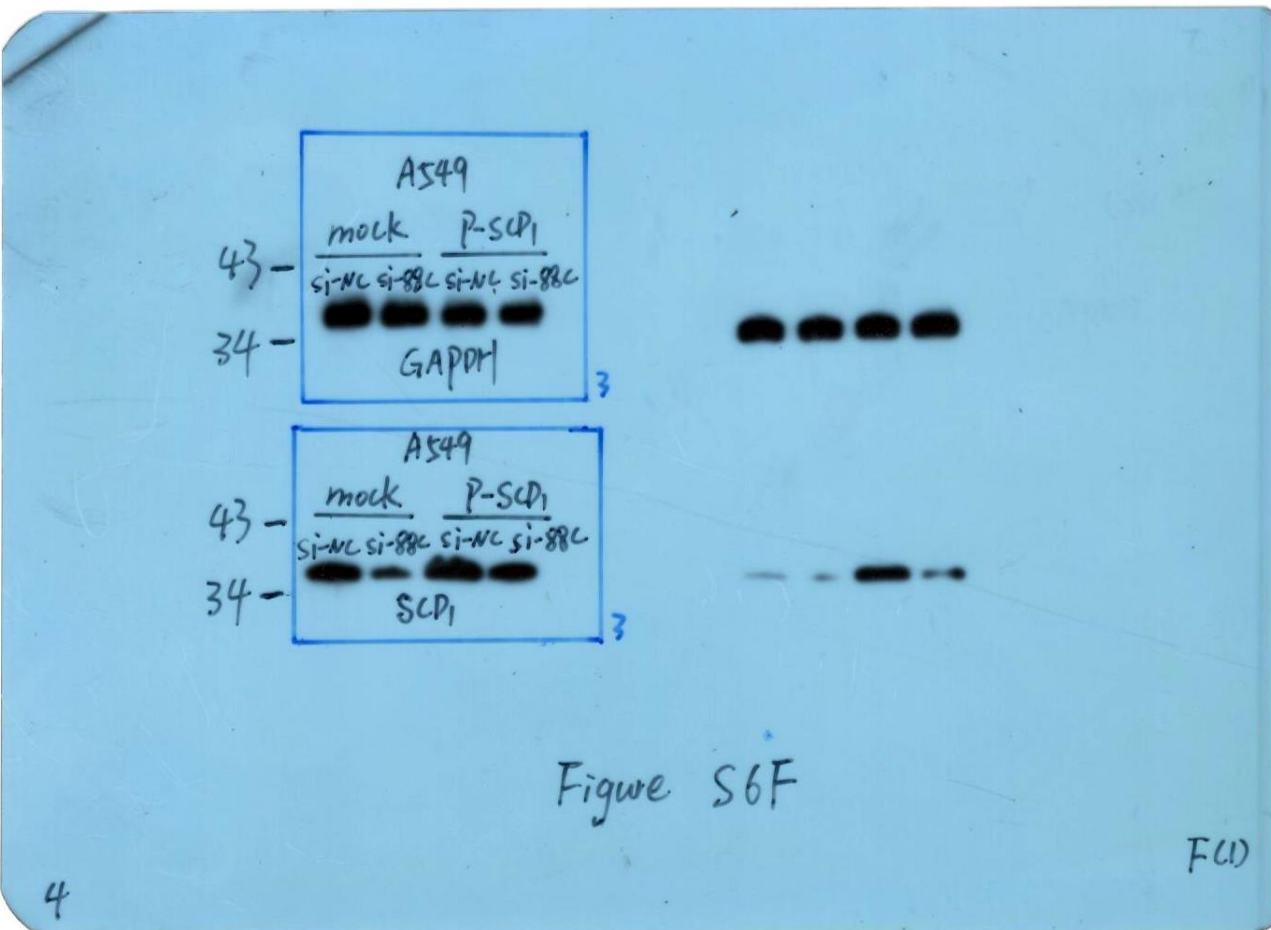

Figure S6F

F(1)

4

Supplement: 41418_2022_1087_MOESM22_ESM.pdf [file 41418_2022_1087_MOESM22_ESM.pdf]

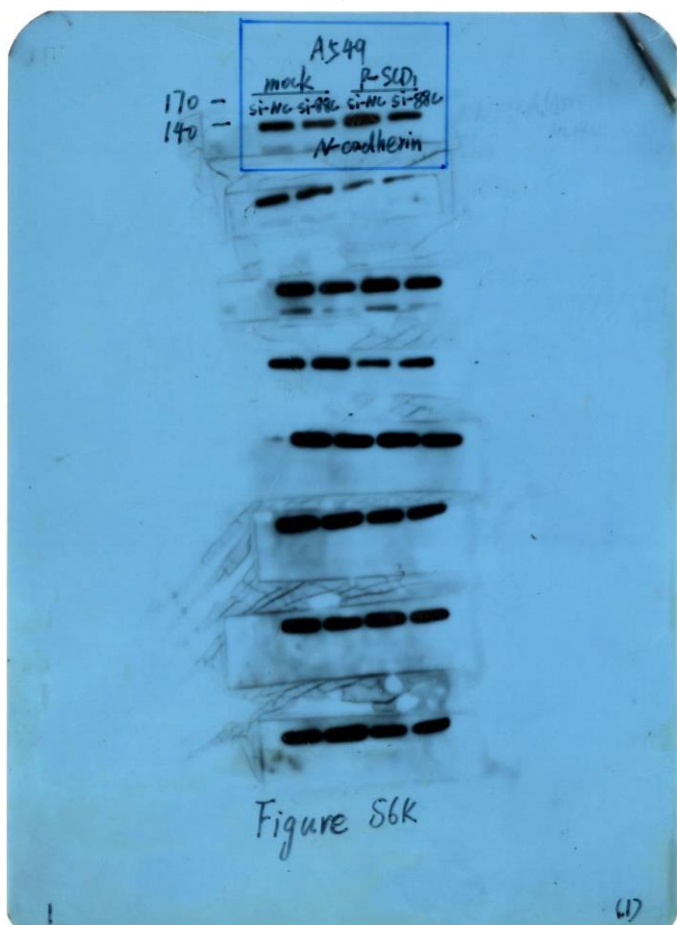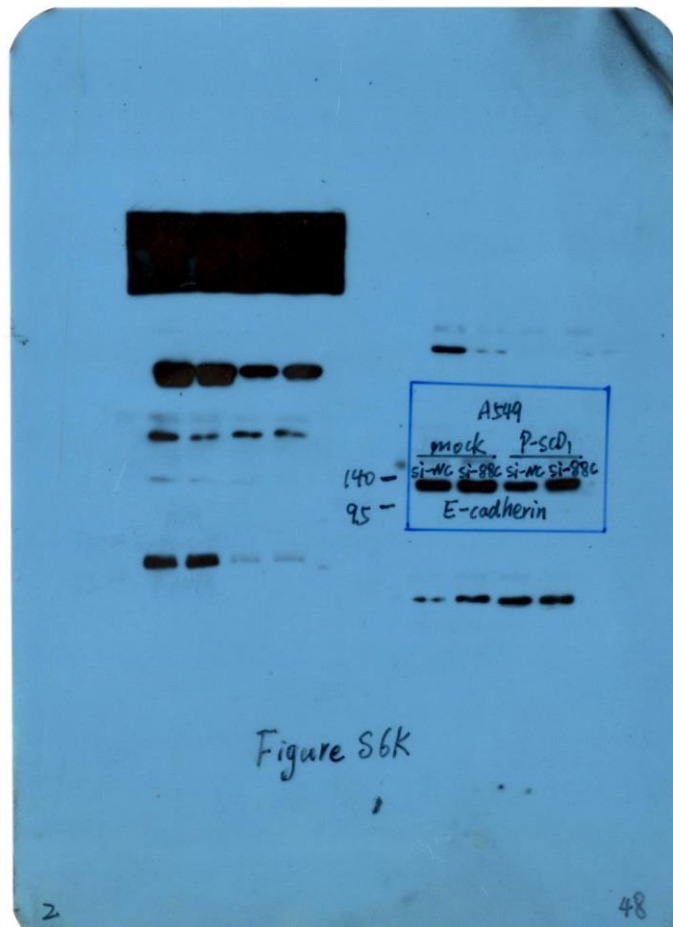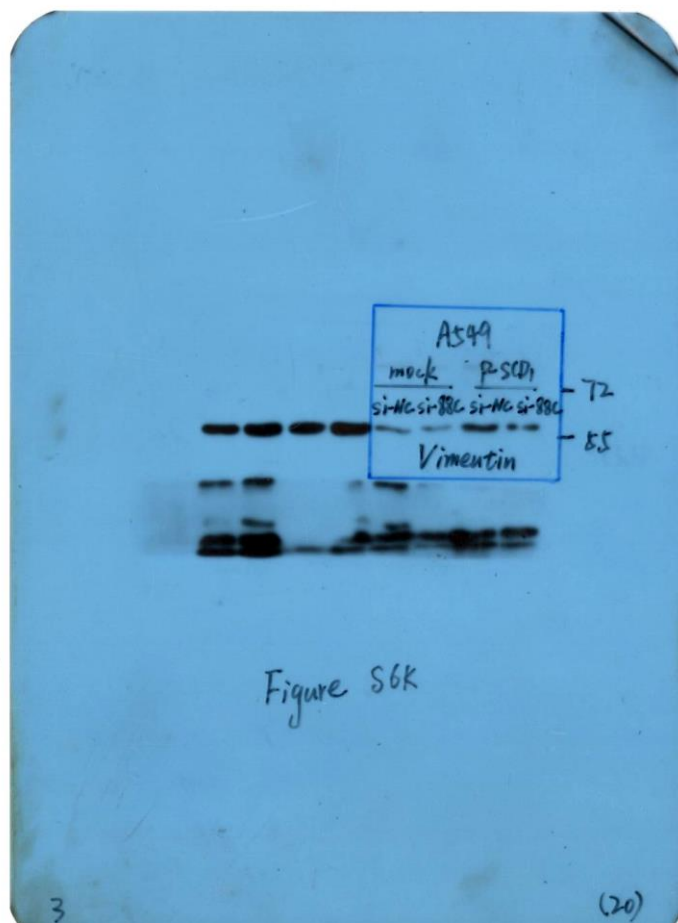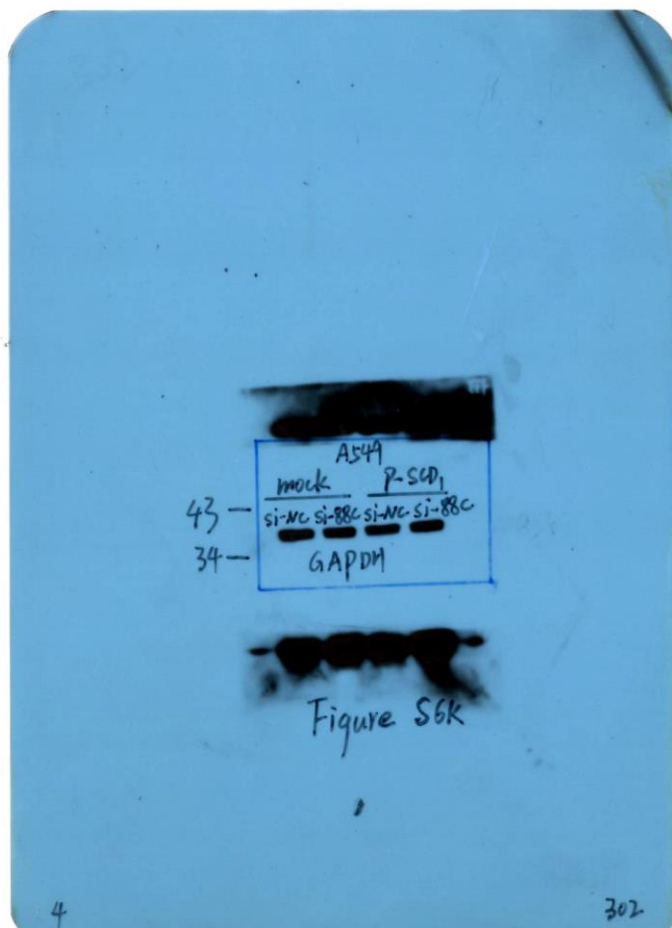

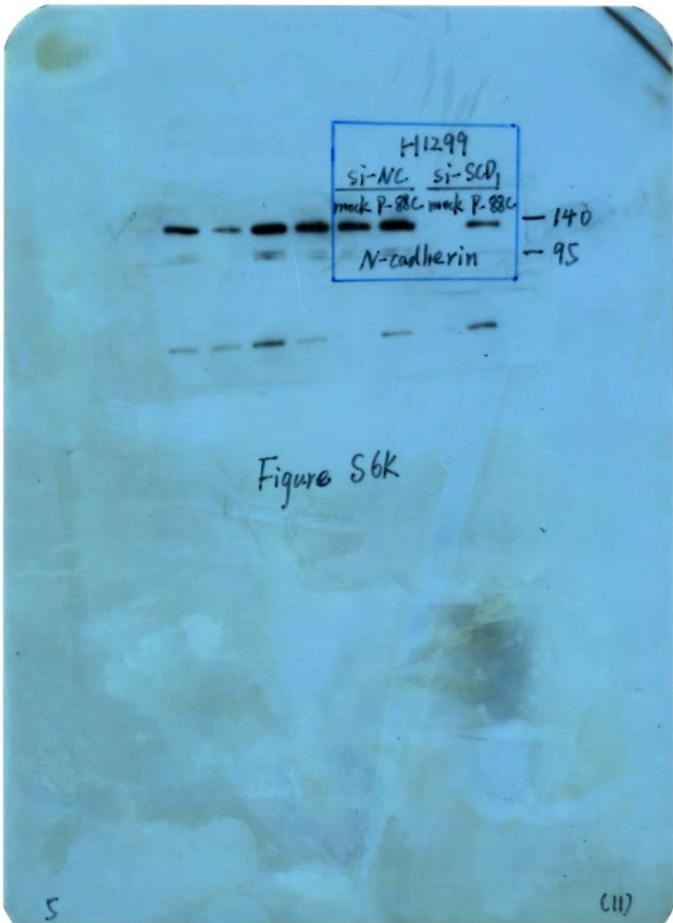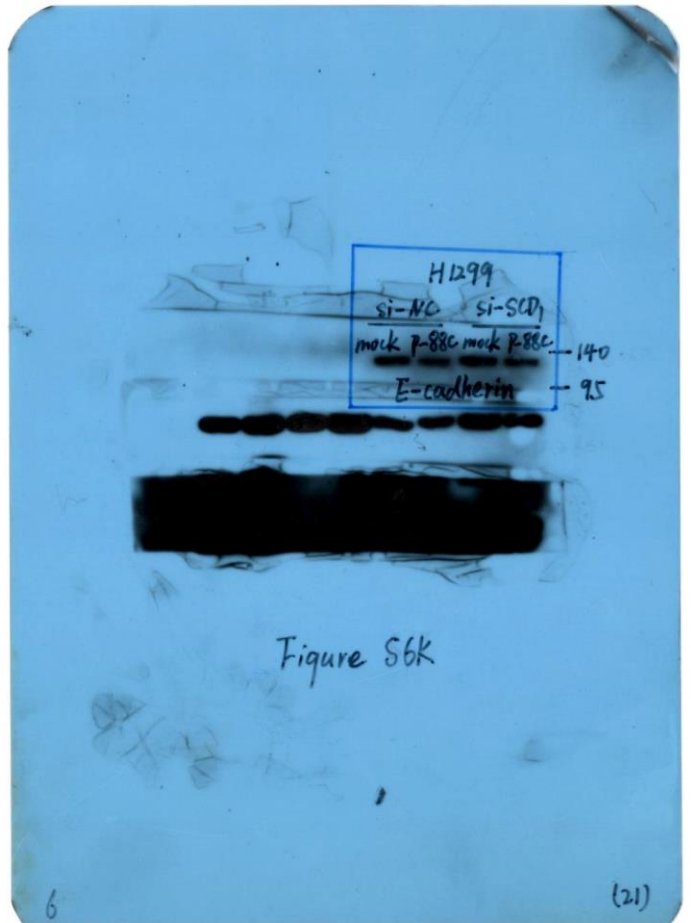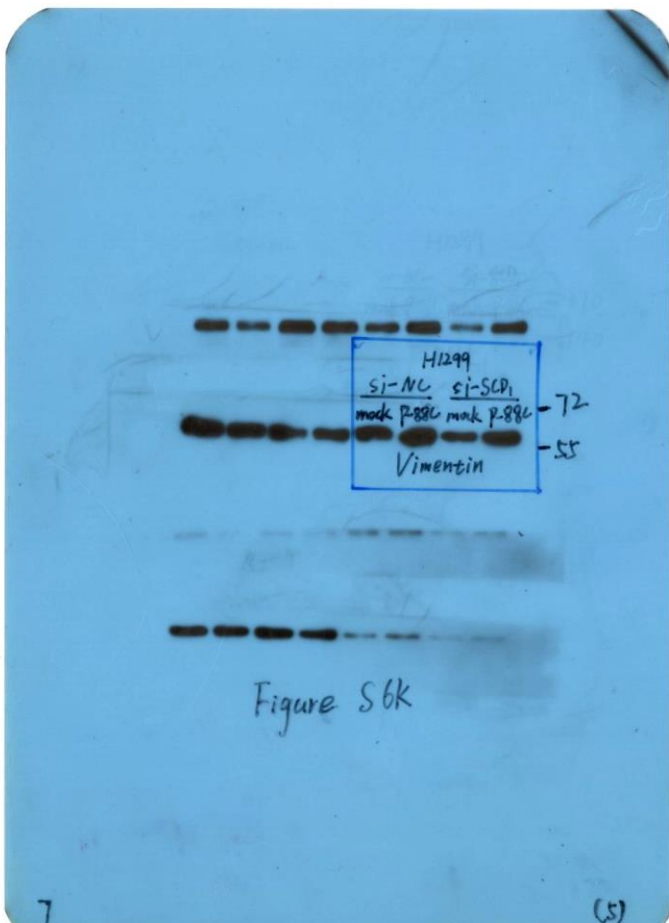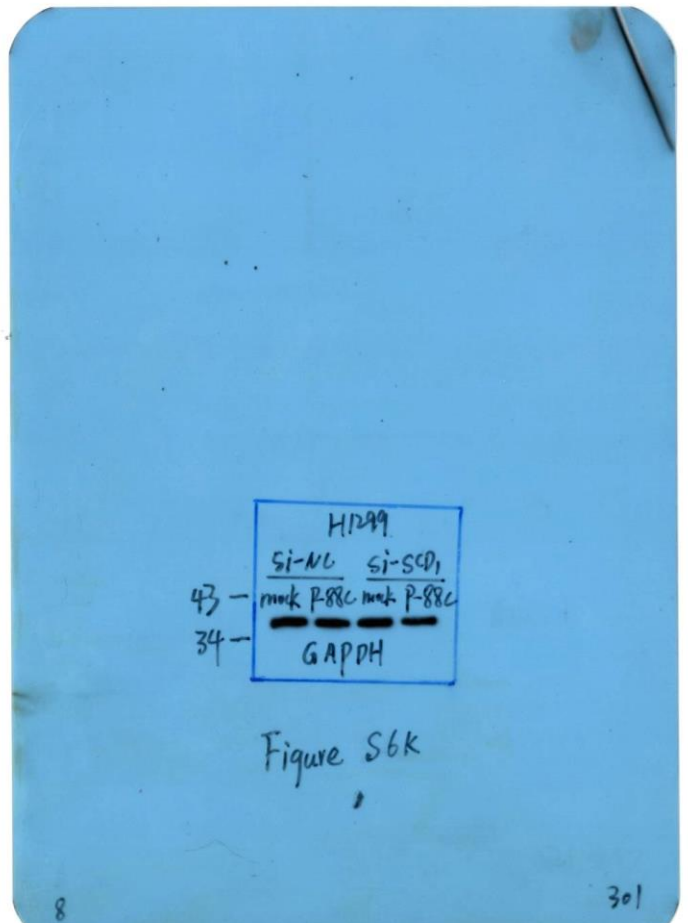

Supplement: 41418_2022_1087_MOESM23_ESM.pdf [file 41418_2022_1087_MOESM23_ESM.pdf]
